# Supplementary material for: Ethnicity and the association between anthropometric indices of obesity and cardiovascular risk in women: a cross-sectional study
Source: PubMed Central journal article supplement — BMJ Open. 2014 May 22;4(5):e004702. doi: 10.1136/bmjopen-2013-004702 (PMC4039846; doi:10.1136/bmjopen-2013-004702), 2014-05-22
Supplement: bmjopen-2013-004702.draft_revisions.pdf [file bmjopen-2013-004702.draft_revisions.pdf]

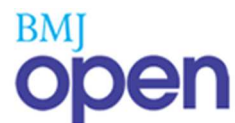

**Ethnicity and the association between anthropometric indices of obesity and cardiovascular risk in women: a cross-sectional study**

|                                 |                                                                                                                                                                                                                                                                                                                             |
|---------------------------------|-----------------------------------------------------------------------------------------------------------------------------------------------------------------------------------------------------------------------------------------------------------------------------------------------------------------------------|
| Journal:                        | <i>BMJ Open</i>                                                                                                                                                                                                                                                                                                             |
| Manuscript ID:                  | bmjopen-2013-004702                                                                                                                                                                                                                                                                                                         |
| Article Type:                   | Research                                                                                                                                                                                                                                                                                                                    |
| Date Submitted by the Author:   | 17-Dec-2013                                                                                                                                                                                                                                                                                                                 |
| Complete List of Authors:       | Goh, Louise; Curtin University, School of Public Health<br>Dhaliwal, Satvinder; Curtin University, School of Public Health<br>Welborn, Timothy; Sir Charles Gairdner Hospital, Endocrinology<br>Lee, Andy; Curtin University, School of Public Health<br>Della, Phillip; Curtin University, School of Nursing and Midwifery |
| <b>Primary Subject Heading</b>: | Public health                                                                                                                                                                                                                                                                                                               |
| Secondary Subject Heading:      | Epidemiology                                                                                                                                                                                                                                                                                                                |
| Keywords:                       | PUBLIC HEALTH, EPIDEMIOLOGY, CARDIOLOGY                                                                                                                                                                                                                                                                                     |
|                                 |                                                                                                                                                                                                                                                                                                                             |

SCHOLARONE™  
Manuscripts

1  
2  
3 **Ethnicity and the association between anthropometric indices of**  
4 **obesity and cardiovascular risk in women: a cross-sectional study**  
5  
6  
7  
8  
9

10  
11 Correspondence to: Professor Satvinder S Dhaliwal

12  
13 School of Public Health, Curtin Health Innovation Research Institute, Curtin University, GPO Box  
14  
15 U1987, Perth, WA 6845, Australia

16  
17 Tel: +618 9266 2949

18  
19 Fax: +618 9266 2958

20  
21 E-mail: [s.dhaliwal@curtin.edu.au](mailto:s.dhaliwal@curtin.edu.au)  
22  
23

24  
25 Louise GH Goh,<sup>1</sup> Satvinder S Dhaliwal,<sup>1</sup> Timothy A Welborn,<sup>2</sup> Andy H Lee,<sup>1</sup> Phillip R Della<sup>3</sup>  
26  
27

28  
29 <sup>1</sup>School of Public Health, Curtin Health Innovation Research Institute, Curtin University, GPO Box  
30  
31 U1987, Perth, WA 6845, Australia

32  
33 <sup>2</sup>Sir Charles Gairdner Hospital, Hospital Avenue, Nedlands, Perth, WA 6009, Australia

34  
35 <sup>3</sup>School of Nursing and Midwifery, Curtin Health Innovation Research Institute, Curtin University,  
36  
37 GPO Box U1987, Perth, WA 6845, Australia  
38  
39

40  
41 Ethnicity, obesity and cardiovascular risk  
42  
43

44  
45 Keywords: Obesity, epidemiology, cardiovascular diseases, prevention and women  
46  
47

48  
49 Word count: 2924  
50  
51  
52  
53  
54  
55  
56  
57  
58  
59  
60

**ABSTRACT**

**Objectives:** The objectives of this study were to determine whether the cross-sectional associations between anthropometric obesity measures, body mass index (BMI), waist circumference (WC) and waist-to-hip ratio (WHR), and calculated 10-year cardiovascular disease (CVD) risk using the Framingham and general CVD risk score models, is the same for women of Australian, United Kingdom and Ireland, North European, South European and Asian descent. This study would investigate which anthropometric obesity measure is most predictive at identifying women at increased CVD risk in each ethnic group.

**Design:** Cross-sectional data from the National Heart Foundation Risk Factor Prevalence Study.

**Setting:** Population-based survey in Australia.

**Participants:** 4354 women aged 20-69 years with no previous history of heart disease, diabetes or stroke. Most participants were of Australian, United Kingdom and Ireland, North European, South European or Asian descent (97%).

**Outcome measures:** Anthropometric obesity measures that demonstrated stronger predictive ability of identifying women at increased CVD risk and likelihood of being above the promulgated treatment thresholds of various risk score models.

**Results:** Central obesity measures, WC, WHR, were better predictors of cardiovascular risk. WHR reported stronger predictive ability than WC and BMI in Caucasian women. In Northern European women, BMI was a better indicator of risk using the general CVD (10% threshold) and Framingham (20% threshold) risk score models. WC was the most predictive of cardiovascular risk among Asian women.

1  
2  
3  
4  
5  
6  
7  
8  
9  
10  
11  
12  
13  
14  
15  
16  
17  
18  
19  
20  
21  
22  
23  
24  
25  
26  
27  
28  
29  
30  
31  
32  
33  
34  
35  
36  
37  
38  
39  
40  
41  
42  
43  
44  
45  
46  
47  
48  
49  
50  
51  
52  
53  
54  
55  
56  
57  
58  
59  
60

**Conclusions:** Ethnicity should be incorporated into CVD assessment. The same anthropometric obesity measure cannot be used across all ethnic groups. Ethnic-specific CVD prevention and treatment strategies need to be further developed.

For peer review only

## ARTICLE SUMMARY

### Strengths and limitations of this study

- This study confirms that ethnicity influences the association between anthropometric obesity measures and CVD risk.
- Central obesity measures such as WC and WHR are better indicators of CVD risk compared to BMI across ethnic groups.
- The treatment threshold used for a risk score model affects the predictive ability of anthropometric obesity measures and the same cut-point may not be suitable across ethnic groups.
- It is a cross-sectional study of the Australian female population in 1989 and these results require confirmation from prospective studies.
- Due to a sample size of about 200 for the Asian population, different regions in Asia could not be compared.
- The CVD risk was estimated using risk score models in order to stratify individuals above and below the respective treatment thresholds and not actual CVD events.

## INTRODUCTION

In Australia, approximately 63% of adults were overweight and obese in 2011-2012.[1] The proportion of the Australian population who are overweight and obese is expected to increase to approximately 66% in the next five years.[2] The National Health and Medical Research Council have developed Clinical Practice Guidelines for the Management of Overweight and Obesity for Adults, Adolescents and Children in Australia to provide guidance on assessing and managing obesity.[3]

Overweight and obesity affects all socioeconomic groups in Australia, but it is more prevalent in some ethnic groups.[4,5] Variations exist in the associations between excess weight and obesity-related conditions among different racial and ethnic groups. Ethnicity significantly affects the associations between anthropometric indices used to assess adiposity such as body mass index (BMI) and waist circumference (WC), and cardiovascular disease (CVD) risk factors.[6]

Previous epidemiological studies which assessed the associations between anthropometric indices of obesity and CVD were mostly conducted in Western societies.[7] It is thus not clear which anthropometric obesity measures are more strongly associated with CVD risk in different ethnic groups.[8] To address this, it is necessary to examine the relationship between anthropometric obesity measures and CVD risk by ethnicity and this has been proposed in previous studies as well.[9-11] These fundamental issues need to be addressed in order to recommend effective weight management and disease prevention strategies to reduce the burden associated with overweight and obesity in all population groups.

The objectives of this study were to determine whether the cross-sectional associations between anthropometric obesity measures (BMI, WC and waist-to-hip ratio) and calculated 10-year CVD risk using the Framingham and general CVD risk score models, is the same for women of Australian, United Kingdom and Ireland, North European, South European and Asian descent. This study would

1  
2  
3 investigate which anthropometric obesity measure is most predictive at identifying women at  
4 increased CVD risk in each ethnic group.  
5  
6  
7

## 8 9 **METHODS**

### 10 11 **Study participants**

12  
13 Participants were selected from the third Risk Factor Prevalence Study [12] conducted by the National  
14 Heart Foundation (NHF) of Australia in 1989. Residents on the federal electoral rolls of December  
15 1988 in North and South Sydney, Melbourne, Brisbane, Adelaide, Perth, Hobart, Darwin and  
16 Canberra were recruited for the Risk Factor Prevalence Study by systemic probability sampling of sex  
17 and 5-year age groups. Country of birth was used as a surrogate for ethnicity and grouped into regions  
18 .[12] We selected a representative sample of 4354 women aged 20-69 years with no previous history  
19 of heart disease, diabetes or stroke for analysis. Most participants were of Australian, United  
20 Kingdom and Ireland, North European, South European or Asian descent (97%).  
21  
22  
23  
24  
25  
26  
27  
28  
29  
30

### 31 32 **Ethics statement**

33 Ethical approval for the NHF data was obtained in advance from the Australian Institute of Health  
34 Interim Ethics Committee, after consultation with the Commonwealth Privacy Commissioner.  
35 Participation was entirely voluntary. Those who participated signed an informed consent form.[12]  
36 Participant information was anonymized prior to analysis. This study was approved by the Human  
37 Research Ethics Committee at Curtin University, and complies with the Declaration of Helsinki.  
38  
39  
40  
41  
42  
43  
44  
45

### 46 47 **Anthropometry**

48 A single record of height (to the nearest centimetre) and weight (to the nearest 10<sup>th</sup> of a kilogram) was  
49 taken in light summer clothes without shoes. BMI was calculated based on weight in kilograms  
50 divided by square of height in meters. Waist and hip circumferences were measured according to  
51 standardized methodologies.[13,14] The WC was measured from the front at the narrowest point  
52 between the rib cage and iliac crest after full expiration while the hip circumference was measured  
53 from the side at the maximal extension of buttocks by one observer using a metal tape. A second  
54  
55  
56  
57  
58  
59  
60

1  
2  
3 observer recorded another set of measurements and ensured that the metal tape was kept strictly  
4 horizontal at all times. The mean of two measurements was taken at each site to the nearest  
5 centimetre. The waist-to-hip ratio (WHR) was calculated based on WC divided by the hip  
6 circumference. Information on demographic characteristics, medical conditions and smoking  
7 behaviour were collected. Mercury sphygmomanometers were used to record blood pressure levels on  
8 the right arm of seated participants five minutes apart. [12] Two readings were taken and the average  
9 was used in the analysis. Fasting blood samples were collected in EDTA tubes and despatched to the  
10 central laboratory at the Division of Clinical Chemistry, Institute of Medical and Veterinary Science,  
11 Adelaide each week for cholesterol levels to be assayed.  
12  
13  
14  
15  
16  
17  
18  
19  
20  
21  
22

### 23 **Risk score models**

24  
25 The Framingham risk score model [15] predicts the 10-year CVD incidence. It was developed from  
26 the American Framingham Heart Study using participants aged 30-74 years who were free of CVD  
27 and cancer. Risk variables used to calculate the 10-year risk include, age, sex, systolic blood pressure  
28 (SBP), diastolic blood pressure, total cholesterol level, high-density lipoprotein (HDL) cholesterol  
29 level, smoking status, diabetes status and ECG-left ventricular hypertrophy.[15] The most commonly  
30 used treatment threshold for the Framingham model was 20%,[16] this denotes that an individual who  
31 has a risk score of more than 20% is considered to be at increased risk of experiencing a CVD event  
32 within the next 10 years and should be targeted for treatment.  
33  
34  
35  
36  
37  
38  
39  
40  
41  
42  
43

44 Although the general CVD risk score model for predicting the 10-year CVD incidence and death was  
45 also developed based on data from the American Framingham Heart Study, it was developed from a  
46 larger cohort and consisted of participants without CVD only.[17] The general CVD risk score model  
47 contains these variables, age, total cholesterol level, HDL cholesterol level, SBP, current  
48 antihypertensive treatment, smoking status and diabetes status.[17] Treatment thresholds of 10% and  
49 20% were reported for this model.[17,18]  
50  
51  
52  
53  
54  
55  
56  
57  
58  
59  
60



### Statistical analysis

Demographic and clinical characteristics of the sample were described using mean  $\pm$  standard deviation for continuous variables, while counts (percentages) were used for categorical variables. Comparisons between means of continuous variables were conducted using Analysis of Variance, with age as a covariate, and with Bonferroni adjustment for multiple comparisons. Means with different superscripts were significantly different at the 5% level of significance. Non-parametric Spearman's rank correlation was used to assess the associations between BMI, WC and WHR and the 10-year predicted CVD risk calculated using Framingham and general CVD risk score models by ethnicity, due to the skewness in the distribution of risk variables. These measures were also converted to z-scores (original value subtracted by the mean and the result divided by the standard deviation) to represent the number of standard deviations above and below the mean of each anthropometric obesity measure for each individual. Logistic regression was used to assess the effects of each standardised obesity measure of being above the recommended treatment threshold for the respective risk score models (10% and 20%), as a result of a one standard deviation increment above the mean of each measure of obesity, by ethnicity. These effects were represented using odds-ratios and associated 95% confidence intervals. The predictive ability of these anthropometric obesity measures to identify individuals from different ethnic groups above the treatment threshold of 20% for the Framingham model for 10-year CVD incidence, and 10% and 20% for the general CVD risk score model for 10-year CVD incidence and death was assessed using the area under the receiver operating characteristic (ROC) curve. Ethnic-specific cut-off values of the anthropometric obesity measures and associated level of specificity to predict increased risk of CVD at 70% and 80% sensitivity were also presented. P-values of less than 0.05 were considered to be statistically significant. All statistical analyses were performed with IBM SPSS Statistics Version 21.

### RESULTS

The demographic and clinical characteristics of the multi-ethnic sample of 4354 women without heart disease, diabetes or stroke were presented in Table 1. Southern European women generally had

1  
2  
3 higher BMI, WC and WHR compared to other ethnic groups, and Asian women had lower  
4 anthropometric obesity measures.  
5  
6  
7

8  
9 All Spearman's rank correlations were statistically significant ( $p < 0.0005$ ). Overall, WC was most  
10 strongly associated with the 10-year predicted risk calculated using the general CVD and Framingham  
11 risk score models across all ethnic groups except in European women (Table 2). BMI was more  
12 strongly correlated with CVD risk calculated using both models in Northern European women while  
13 WHR was more strongly correlated with the predicted risk in Southern European women.  
14  
15  
16  
17  
18  
19

20  
21 The recommended treatment thresholds for the general CVD at 10% and 20%, and the Framingham  
22 risk score model at 20% were identified from a review of the literature. Table 3a presented the effects  
23 of a one standard deviation increment in BMI, WC and WHR above the mean on the likelihood of  
24 being above the recommended threshold in each ethnic group. Increase in anthropometric  
25 measurements was generally associated with an increased likelihood of being above the treatment  
26 thresholds for all models. A one standard deviation change in all obesity measures in Asian women  
27 did not have a significant effect on the CVD risk as calculated using the general CVD model both at  
28 the 10% and 20% threshold. BMI was not effective in predicting the likelihood of being above the  
29 treatment threshold across all models for Southern European women.  
30  
31  
32  
33  
34  
35  
36  
37  
38  
39  
40

41 Table 3b summarised the results in Table 3a by presenting only statistically significant anthropometric  
42 obesity measures which increased the likelihood of individuals being above the treatment threshold,  
43 with measures of obesity ordered corresponding to odds-ratios, from the highest to lowest. WHR  
44 generally recorded higher odds-ratios than WC and BMI and increased the likelihood of individuals of  
45 different ethnicity being above the respective treatment thresholds of the respective models. Only  
46 BMI presented higher odds-ratios and increased the likelihood of Northern European women being  
47 indicated for treatment based on the predicted risk calculated from the general CVD model at the 10%  
48 threshold but not 20% threshold and Framingham model at the 20% threshold. WC recorded higher  
49 odds-ratios in Asian women using the Framingham model at the 20% threshold.  
50  
51  
52  
53  
54  
55  
56  
57  
58  
59  
60

1  
2  
3 Higher area under the ROC curve, sensitivity and specificity were recorded with WHR in predicting  
4 the 10-year CVD risk calculated using the general CVD and Framingham risk score models across  
5 most ethnic groups (Table 4). The highest area under the ROC curve and specificity value at 80%  
6 sensitivity for WHR was 0.866 and 84.9% for Northern European women with the general CVD  
7 model at the 20% threshold.  
8  
9  
10  
11

12  
13  
14  
15 In Northern European women, BMI was a better predictor of CVD risk calculated using the general  
16 CVD risk score model at the 10% threshold but not 20% threshold and the Framingham risk score  
17 model at the 20% threshold, compared with WC and WHR. WHR, however, was the better indicator  
18 of CVD risk using the general CVD risk score model with a 20% threshold, in Northern European  
19 women. In Asian women, WC reported consistently higher area under the ROC curve, sensitivity and  
20 specificity across all CVD models and thresholds. The area under the ROC curve values ranged from  
21 0.630 to 0.688 and specificity values ranged from 50.5% to 53.3% at 80% sensitivity in Asian women.  
22  
23 The cut-off values for BMI, WC and WHR were also presented in Table 4. A WHR value of 0.75  
24 would indicate increased CVD risk for women from Australia and United Kingdom and Ireland while  
25 a value of 0.78 would indicate increased risk for Southern European women. In Asian women, a WC  
26 of 71.8 cm would indicate increased CVD risk. A BMI of 24.4 kg/m<sup>2</sup> would indicate increased risk in  
27 Northern European women. The diagnostic abilities of the various anthropometric obesity measures to  
28 identify women as being above the threshold and hence identified for treatment varies according to  
29 ethnic groups.  
30  
31  
32  
33  
34  
35  
36  
37  
38  
39  
40  
41  
42  
43  
44  
45  
46  
47  
48  
49  
50  
51  
52  
53  
54  
55  
56  
57  
58  
59  
60

**Table 1 Characteristics of the sample of 4354 women without heart disease, diabetes or stroke by ethnicity**

|                               | Statistics | Australia                | UK and Ireland            | Northern Europe            | Southern Europe          | Asia                       |
|-------------------------------|------------|--------------------------|---------------------------|----------------------------|--------------------------|----------------------------|
| <b>Count</b>                  | N          | 3329                     | 416                       | 180                        | 234                      | 195                        |
| <b>Age (years)</b>            | Mean ± SD  | 41.9 ± 13.5              | 45.7 ± 12.5               | 49.0 ± 11.7                | 47.8 ± 10.6              | 40.5 ± 10.9                |
| <b>Current smoker (Yes)</b>   | n (%)      | 751 (22.6%)              | 91 (21.9%)                | 39 (21.7%)                 | 32 (13.7%)               | 19 (9.7%)                  |
| <b>Weight (kg)</b>            | Mean ± SD  | 65.4 ± 12.6 <sup>a</sup> | 65.2 ± 12.0 <sup>a</sup>  | 66.5 ± 12.6 <sup>a</sup>   | 66.9 ± 11.8 <sup>a</sup> | 58.6 ± 11.6 <sup>b</sup>   |
| <b>Height (cm)</b>            | Mean ± SD  | 162.8 ± 6.0 <sup>a</sup> | 162.3 ± 6.2 <sup>a</sup>  | 161.9 ± 6.2 <sup>a</sup>   | 156.8 ± 6.1 <sup>b</sup> | 156.7 ± 5.7 <sup>b</sup>   |
| <b>BMI (kg/m<sup>2</sup>)</b> | Mean ± SD  | 24.7 ± 4.8 <sup>b</sup>  | 24.7 ± 4.2 <sup>b,c</sup> | 25.4 ± 4.6 <sup>b,d</sup>  | 27.2 ± 4.4 <sup>a</sup>  | 23.8 ± 4.3 <sup>c,d</sup>  |
| <b>WC (cm)</b>                | Mean ± SD  | 75.9 ± 11.0 <sup>b</sup> | 76.2 ± 10.5 <sup>b</sup>  | 78.4 ± 11.9 <sup>b</sup>   | 81.2 ± 11.0 <sup>a</sup> | 73.9 ± 10.4 <sup>b</sup>   |
| <b>WHR</b>                    | Mean ± SD  | 0.76 ± 0.06 <sup>c</sup> | 0.76 ± 0.06 <sup>c</sup>  | 0.77 ± 0.07 <sup>b,c</sup> | 0.79 ± 0.06 <sup>a</sup> | 0.77 ± 0.06 <sup>a,b</sup> |
| <b>SBP (mmHg)</b>             | Mean ± SD  | 122 ± 18 <sup>a</sup>    | 123 ± 18 <sup>b,c</sup>   | 126 ± 19 <sup>a,b,c</sup>  | 127 ± 19 <sup>a,b</sup>  | 116 ± 19 <sup>c</sup>      |
| <b>HDL (mmol/L)</b>           | Mean ± SD  | 1.5 ± 0.4 <sup>a</sup>   | 1.5 ± 0.4 <sup>a</sup>    | 1.5 ± 0.4 <sup>a</sup>     | 1.4 ± 0.3 <sup>b</sup>   | 1.4 ± 0.4 <sup>a,b</sup>   |
| <b>TC (mmol/L)</b>            | Mean ± SD  | 5.4 ± 1.1                | 5.6 ± 1.2                 | 5.7 ± 1.3                  | 5.7 ± 1.1                | 5.2 ± 1.0                  |
| <b>Ratio: HDL to TC</b>       | Mean ± SD  | 3.9 ± 1.3 <sup>b</sup>   | 4.0 ± 1.4 <sup>a,b</sup>  | 4.0 ± 1.4 <sup>b</sup>     | 4.3 ± 1.4 <sup>a</sup>   | 3.9 ± 1.2 <sup>a,b</sup>   |

<sup>a,b,c,d</sup> Means with different superscripts were significantly different at the 5% level of significance, after adjusting for age.

Abbreviations: BMI, body mass index; WC, waist circumference; WHR, waist-to-hip ratio; SBP, systolic blood pressure; HDL, high-density lipoprotein cholesterol; TC, total cholesterol.

**Table 2 Non-parametric correlations between anthropometric measurements of general and central obesity and 10-year predicted risk of CVD incidence and mortality by ethnicity in 4354 women**

| Ethnicity                                                             | BMI   | WC    | WHR   |
|-----------------------------------------------------------------------|-------|-------|-------|
| <i>General CVD 10-year predicted risk for CVD incidence and death</i> |       |       |       |
| Australia                                                             | 0.372 | 0.443 | 0.402 |
| UK and Ireland                                                        | 0.360 | 0.406 | 0.365 |
| Northern Europe                                                       | 0.504 | 0.462 | 0.435 |
| Southern Europe                                                       | 0.356 | 0.479 | 0.485 |
| Asia                                                                  | 0.306 | 0.396 | 0.308 |
| Overall                                                               | 0.384 | 0.451 | 0.408 |
| <i>Framingham 10-year predicted risk for CVD incidence</i>            |       |       |       |
| Australia                                                             | 0.366 | 0.440 | 0.405 |
| UK and Ireland                                                        | 0.349 | 0.399 | 0.361 |
| Northern Europe                                                       | 0.500 | 0.464 | 0.445 |
| Southern Europe                                                       | 0.358 | 0.483 | 0.491 |
| Asia                                                                  | 0.311 | 0.402 | 0.308 |
| Overall                                                               | 0.380 | 0.449 | 0.412 |

All Spearman's rank correlations significant at the  $p < 0.0005$  level

Abbreviations: BMI, body mass index; WC, waist circumference; WHR, waist-to-hip ratio.

**Table 3a Odds-ratios and associated 95% confidence intervals of being above the recommended treatment threshold for various risk score models as a result of a 1 standard deviation increment above the mean for each anthropometric measure of obesity by ethnicity**

| Ethnicity                                                                                       | BMI                             | WC                    | WHR                   |
|-------------------------------------------------------------------------------------------------|---------------------------------|-----------------------|-----------------------|
| <i>General CVD 10-year predicted risk for CVD incidence and death (threshold = 10%) [18]</i>    |                                 |                       |                       |
| Australia                                                                                       | 1.69*** (1.55 - 1.85)           | 2.16*** (1.96 - 2.38) | 2.36*** (2.13 - 2.62) |
| UK and Ireland                                                                                  | 1.71*** (1.29 - 2.25)           | 1.86*** (1.42 - 2.43) | 2.09*** (1.58 - 2.75) |
| Northern Europe                                                                                 | 2.50*** (1.67 - 3.74)           | 2.28*** (1.61 - 3.24) | 2.23*** (1.55 - 3.21) |
| Southern Europe                                                                                 | 1.37 (0.97 - 1.94)              | 1.64** (1.18 - 2.28)  | 1.89** (1.32 - 2.70)  |
| Asia                                                                                            | 1.14 (0.62 - 2.09)              | 1.57 (0.97 - 2.56)    | 1.48 (0.88 - 2.47)    |
| <i>General CVD 10-year predicted risk for CVD incidence and death (threshold = 20%) [17,19]</i> |                                 |                       |                       |
| Australia                                                                                       | 1.65*** (1.43 - 1.91)           | 2.07*** (1.78 - 2.41) | 2.11*** (1.80 - 2.47) |
| UK and Ireland                                                                                  | 1.12 (0.64 - 1.96)              | 1.22 (0.73 - 2.05)    | 1.68* (1.05 - 2.69)   |
| Northern Europe                                                                                 | 2.60** (1.44 - 4.70)            | 2.76*** (1.58 - 4.80) | 3.23*** (1.74 - 5.97) |
| Southern Europe                                                                                 | 1.17 (0.58 - 2.35)              | 1.77 (0.96 - 3.28)    | 2.15* (1.11 - 4.18)   |
| Asia                                                                                            | 0.96 (0.19 - 4.94)              | 1.15 (0.29 - 4.57)    | 0.71 (0.13 - 3.92)    |
| <i>Framingham 10-year predicted risk for CVD incidence (threshold = 20%) [20,21]</i>            |                                 |                       |                       |
| Australia                                                                                       | 1.67*** (1.52 - 1.82)           | 2.13*** (1.94 - 2.34) | 2.37*** (2.14 - 2.63) |
| UK and Ireland                                                                                  | 1.71*** (1.30 - 2.25)           | 1.88*** (1.45 - 2.45) | 2.16*** (1.64 - 2.85) |
| Northern Europe                                                                                 | 2.55*** (1.70 - 3.85)           | 2.27*** (1.59 - 3.23) | 2.33*** (1.60 - 3.40) |
| Southern Europe                                                                                 | 1.32 (0.94 - 1.84)              | 1.67** (1.21 - 2.30)  | 2.07*** (1.45 - 2.95) |
| Asia                                                                                            | 1.65 <sup>#</sup> (0.99 - 2.76) | 1.89** (1.20 - 2.97)  | 1.63* (1.02 - 2.61)   |

\*  $p < 0.05$ , \*\*  $p < 0.01$ , \*\*\*  $p < 0.001$ , <sup>#</sup>  $p = 0.054$

Abbreviations: BMI, body mass index; WC, waist circumference; WHR, waist-to-hip ratio.

**Table 3b Significant anthropometric measurements of general and central obesity and 10-year predicted risk of CVD incidence and mortality by ethnicity**

| Ethnicity                   | General CVD<br>(threshold = 10%) | General CVD<br>(threshold = 20%) | Framingham<br>(threshold = 20%) |
|-----------------------------|----------------------------------|----------------------------------|---------------------------------|
| <b>Odds-ratio criterion</b> |                                  |                                  |                                 |
| Australia                   | WHR, WC, BMI                     | WHR, WC, BMI                     | WHR, WC, BMI                    |
| UK and Ireland              | WHR, WC, BMI                     | WHR                              | WHR, WC, BMI                    |
| Northern Europe             | BMI, WC, WHR                     | WHR, WC, BMI                     | BMI, WHR, WC                    |
| Southern Europe             | WHR, WC                          | WHR                              | WHR, WC                         |
| Asia                        | WC <sup>#</sup>                  | -                                | WC, WHR                         |

Each cell represents statistically significant anthropometric measures of obesity ordered corresponding to odds-ratios, from the highest to lowest. <sup>#</sup>p = 0.054

Abbreviations: BMI, body mass index; WC, waist circumference; WHR, waist-to-hip ratio.

**Table 4 Area under the curve and cut-points for anthropometric measurements of general and central obesity to predict increased risk of CVD using risk score models at different thresholds for various levels of sensitivity and specificity by ethnicity**

|                                                                                         | AUC                   | Sensitivity = 70% | Sensitivity = 80% |
|-----------------------------------------------------------------------------------------|-----------------------|-------------------|-------------------|
| <b>General CVD 10-year predicted risk for CVD incidence and death (threshold = 10%)</b> |                       |                   |                   |
| Australia                                                                               |                       |                   |                   |
| BMI                                                                                     | 0.691 (0.666 , 0.716) | 24.2 (60.1%)      | 23.0 (46.1%)      |
| WC                                                                                      | 0.750 (0.727 , 0.772) | 77.3 (69.6%)      | 74.3 (57.9%)      |
| WHR                                                                                     | 0.759 (0.736 , 0.783) | 0.77 (70.1%)      | 0.75 (58.0%)      |
| UK and Ireland                                                                          |                       |                   |                   |
| BMI                                                                                     | 0.655 (0.584 , 0.726) | 23.7 (50.6%)      | 22.8 (41.2%)      |
| WC                                                                                      | 0.676 (0.611 , 0.741) | 75.3 (58.5%)      | 73.3 (51.2%)      |
| WHR                                                                                     | 0.729 (0.671 , 0.787) | 0.77 (65.6%)      | 0.75 (52.4%)      |
| Northern Europe                                                                         |                       |                   |                   |
| BMI                                                                                     | 0.770 (0.695 , 0.845) | 25.8 (71.4%)      | 24.4 (58.7%)      |
| WC                                                                                      | 0.761 (0.682 , 0.840) | 77.8 (66.7%)      | 75.3 (57.1%)      |
| WHR                                                                                     | 0.730 (0.642 , 0.817) | 0.77 (59.5%)      | 0.75 (50.8%)      |
| Southern Europe                                                                         |                       |                   |                   |
| BMI                                                                                     | 0.618 (0.536 , 0.699) | 26.5 (52.8%)      | 25.5 (44.9%)      |
| WC                                                                                      | 0.686 (0.604 , 0.768) | 81.8 (62.4%)      | 78.8 (53.4%)      |
| WHR                                                                                     | 0.702 (0.619 , 0.785) | 0.80 (61.8%)      | 0.79 (57.9%)      |
| Asia                                                                                    |                       |                   |                   |
| BMI                                                                                     | 0.564 (0.411 , 0.717) | 21.9 (38.2%)      | 21.8 (37.6%)      |
| WC                                                                                      | 0.651 (0.524 , 0.778) | 73.3 (60.0%)      | 71.8 (52.4%)      |
| WHR                                                                                     | 0.614 (0.490 , 0.739) | 0.76 (56.5%)      | 0.76 (54.7%)      |
| <b>General CVD 10-year predicted risk for CVD incidence and death (threshold = 20%)</b> |                       |                   |                   |
| Australia                                                                               |                       |                   |                   |
| BMI                                                                                     | 0.725 (0.677 , 0.772) | 25.5 (68.8%)      | 24.3 (58.1%)      |
| WC                                                                                      | 0.782 (0.743 , 0.821) | 79.8 (72.3%)      | 77.8 (66.4%)      |
| WHR                                                                                     | 0.784 (0.745 , 0.823) | 0.79 (76.3%)      | 0.77 (65.7%)      |
| UK and Ireland                                                                          |                       |                   |                   |
| BMI                                                                                     | 0.550 (0.414 , 0.685) | 23.0 (40.2%)      | 21.7 (25.4%)      |
| WC                                                                                      | 0.589 (0.472 , 0.706) | 74.8 (52.2%)      | 73.8 (48.3%)      |
| WHR                                                                                     | 0.682 (0.572 , 0.791) | 0.77 (61.3%)      | 0.75 (47.3%)      |
| Northern Europe                                                                         |                       |                   |                   |
| BMI                                                                                     | 0.818 (0.727 , 0.908) | 28.7 (82.4%)      | 26.3 (67.3%)      |
| WC                                                                                      | 0.861 (0.785 , 0.936) | 85.3 (81.1%)      | 84.3 (79.2%)      |
| WHR                                                                                     | 0.866 (0.784 , 0.947) | 0.84 (86.8%)      | 0.83 (84.9%)      |
| Southern Europe                                                                         |                       |                   |                   |
| BMI                                                                                     | 0.578 (0.437 , 0.719) | 26.8 (51.9%)      | 26.7 (50.9%)      |
| WC                                                                                      | 0.711 (0.562 , 0.859) | 84.8 (69.6%)      | 84.8 (69.6%)      |
| WHR                                                                                     | 0.725 (0.553 , 0.897) | 0.80 (62.1%)      | 0.79 (55.6%)      |
| Asia                                                                                    |                       |                   |                   |
| BMI                                                                                     | 0.555 (0.303 , 0.807) | 25.4 (73.1%)      | 21.9 (37.9%)      |
| WC                                                                                      | 0.630 (0.466 , 0.795) | 78.3 (73.6%)      | 71.8 (50.5%)      |



|                                                                                     |                       |              |              |
|-------------------------------------------------------------------------------------|-----------------------|--------------|--------------|
| WHR                                                                                 | 0.440 (0.306 , 0.573) | 0.76 (52.2%) | 0.74 (35.7%) |
| <b><i>Framingham 10-year predicted risk for CVD incidence (threshold = 20%)</i></b> |                       |              |              |
| Australia                                                                           |                       |              |              |
| BMI                                                                                 | 0.682 (0.657 , 0.707) | 24.0 (57.9%) | 22.9 (43.8%) |
| WC                                                                                  | 0.745 (0.723 , 0.768) | 76.8 (67.5%) | 73.8 (55.8%) |
| WHR                                                                                 | 0.759 (0.736 , 0.781) | 0.77 (69.7%) | 0.75 (58.1%) |
| UK and Ireland                                                                      |                       |              |              |
| BMI                                                                                 | 0.656 (0.586 , 0.726) | 23.7 (50.6%) | 22.5 (37.5%) |
| WC                                                                                  | 0.682 (0.620 , 0.745) | 75.3 (58.6%) | 73.3 (51.8%) |
| WHR                                                                                 | 0.735 (0.679 , 0.791) | 0.77 (65.8%) | 0.75 (54.2%) |
| Northern Europe                                                                     |                       |              |              |
| BMI                                                                                 | 0.783 (0.710 , 0.856) | 26.3 (75.2%) | 24.9 (65.1%) |
| WC                                                                                  | 0.770 (0.691 , 0.850) | 78.8 (71.3%) | 76.3 (60.5%) |
| WHR                                                                                 | 0.742 (0.652 , 0.832) | 0.77 (62.8%) | 0.75 (51.2%) |
| Southern Europe                                                                     |                       |              |              |
| BMI                                                                                 | 0.597 (0.514 , 0.680) | 25.8 (47.1%) | 25.1 (40.1%) |
| WC                                                                                  | 0.680 (0.601 , 0.760) | 80.8 (57.6%) | 78.3 (53.5%) |
| WHR                                                                                 | 0.711 (0.633 , 0.789) | 0.79 (61.6%) | 0.78 (51.7%) |
| Asia                                                                                |                       |              |              |
| BMI                                                                                 | 0.647 (0.524 , 0.770) | 23.5 (55.1%) | 21.9 (39.5%) |
| WC                                                                                  | 0.688 (0.586 , 0.790) | 73.3 (60.5%) | 71.8 (53.3%) |
| WHR                                                                                 | 0.645 (0.530 , 0.759) | 0.76 (56.9%) | 0.75 (44.3%) |

Abbreviations: AUC, area under the curve; BMI, body mass index; WC, waist circumference; WHR, waist-to-hip ratio.

## DISCUSSION

Our study found anthropometric measures of central obesity (WC and WHR) to be better indicators of CVD risk as they measure ectopic body fat (fat stored in the abdominal region) which is associated with decreased glucose tolerance, reduced insulin sensitivity, adverse lipid profiles and other metabolic abnormalities which are risk factors for CVD and diabetes.[8] Stronger associations were also reported between WC and the 10-year predicted CVD risk calculated using the general CVD and Framingham risk score models across most ethnic groups, while WHR recorded higher odds-ratios than WC and BMI and increased the likelihood of women being above the respective treatment thresholds of the models. WHR also presented higher area under the ROC curve, sensitivity and specificity values. Our findings are consistent with previous studies which have shown that WC and WHR, measures of central adiposity, are superior to BMI in predicting CVD and other obesity-related risk.[22-25] WC has already been incorporated in the diagnosis of the metabolic syndrome, a cluster of risk factors for CVD and diabetes.[26]

WHR should also be incorporated into CVD risk assessment. Our study provided evidence that WHR is a better diagnostic predictor of CVD than BMI and WC. It is also suitable for assessing adiposity and CVD risk in multi-ethnic cohorts as it has low measurement error, high precision, and no bias over a wide range of ethnic groups.[27] Similar cut-off values for WHR could also be applied across ethnic groups; a value of 0.75 and 0.78 would indicate increased CVD risk for women of Australia and United Kingdom and Ireland, and Southern Europe descent, respectively. A study conducted on Latin Americans, non-Hispanic Whites and Blacks and Hispanics to estimate the accuracy and optimal cut-points for BMI, WC and WHR also found that a cut-point of 0.91 for WHR and 94 cm for WC could be used among women of different ethnicity to identify those at high coronary heart disease (CHD) risk.[28] WHR also reported the highest area under the ROC curve across all ethnic groups, ranging from 0.75 to 0.82.[28] It was also the most accurate measure to screen for high CHD risk individuals.[28] Another large case-control study of markers of obesity and myocardial infarction confirmed that WHR is a stronger indicator of myocardial infarction than BMI and increased the population attributable risk of obesity by more than 3-fold in all ethnic groups.[29] The superiority of

1  
2  
3 WHR over BMI and WC in predicting CVD risk is also demonstrated in prospective studies.[22,30-  
4  
5 33]

6  
7  
8  
9 The measurement of WHR, however, may pose some challenges. For example, it may be  
10 inappropriate to measure hip circumference in certain cultures but this can be overcome with same sex  
11 observers.[27] Some studies reported that WHR is imprecise while others reported that it is a precise  
12 measure.[27,30,34,35] The differing results could be related to the rigour of the techniques used,  
13 standardised techniques need to be adopted when measuring WHR.[27] It is not suitable for assessing  
14 central adiposity in the elderly [36] due to laxity of their abdominal muscles which would undermine  
15 the predictive value of abdominal circumferences.[37] In addition, WHR may remain constant during  
16 weight change and is not suitable for monitoring weight loss.[38] Finally, there are technical  
17 difficulties in accurately measuring the hip circumference of severely obese individuals ( $BMI \geq 40$   
18  $kg/m^2$ ).[27] Measurements may be made in the supine position to overcome this problem.[27] In  
19 clinical settings, it may be more feasible to assess adiposity using WC while WHR could be measured  
20 in research studies as it is more informative.[30]

21  
22  
23  
24  
25  
26  
27  
28  
29  
30  
31  
32  
33  
34  
35  
36 Although WHR was the best anthropometric obesity measure in relation to identifying individuals at  
37 increased CVD risk, this did not apply to Northern European women. BMI was a better indicator of  
38 CVD risk using the general CVD risk score model at the 10% threshold but not 20% threshold and the  
39 Framingham risk score model at the 20% threshold, with stronger correlations, higher odds-ratios,  
40 higher area under the ROC curves, sensitivity and specificity values presented, compared to WHR. At  
41 the 20% threshold of the general CVD risk score model, WHR was the better predictor of CVD risk in  
42 Northern European women compared to BMI. This indicates that the predictive ability of  
43 anthropometric measures of obesity vary with the treatment thresholds used for the respective risk  
44 score models and the same cut-point may not be suitable across ethnic groups.

45  
46  
47  
48  
49  
50  
51  
52  
53  
54  
55  
56 WC was a better predictor of CVD risk among Asian women compared to BMI and WHR. This was  
57 consistent with the results of another cross-sectional population-based survey study on Chinese people  
58  
59  
60

1  
2  
3 which reported that WC is the best predictor of CVD risk factors in women.[39] It was also the best  
4 marker of risk in a 6-year prospective study.[40] A small increment in WC predicted a substantial  
5 increase in CHD risk in the Chinese population.[40] A lower WC cut-off for Asians is necessary to  
6 avoid underestimating the population at risk.[41,42]  
7  
8  
9

10  
11  
12  
13 Our study has limitations. It is a cross-sectional study of the Australian female population in 1989 and  
14 these results require confirmation from prospective studies. Due to a sample size of about 200 for the  
15 Asian population, different regions in Asia could not be compared. Further, the CVD risk was  
16 estimated using risk score models in order to stratify individuals above and below the respective  
17 treatment thresholds and not actual CVD events.  
18  
19  
20  
21  
22  
23

## 24 25 **CONCLUSIONS**

26  
27 Our study confirms that ethnicity influences the association between anthropometric obesity measures  
28 and CVD risk. Central obesity measures such as WC and WHR are better indicators of CVD risk  
29 compared to BMI across ethnic groups. WHR is the best anthropometric measure for predicting CVD  
30 risk in women except Northern European and Asian women. The treatment threshold used for a risk  
31 score model affects the predictive ability of anthropometric obesity measures and the same cut-point  
32 may not be suitable across ethnic groups.  
33  
34  
35  
36  
37  
38  
39

40  
41 It is important to incorporate ethnicity in CVD risk assessment. Prevention and treatment efforts  
42 should be tailored to meet the needs of each ethnic group.[43] Ethnic-specific CVD prevention  
43 strategies need to be developed to promote healthy eating and physical activity to curtail obesity.  
44 Continued population-based prospective research is necessary to elucidate the link between obesity  
45 and CVD by ethnicity.  
46  
47  
48  
49  
50  
51

52  
53  
54 **Acknowledgements** Curtin University provided educational support to LGHG through the Curtin  
55 International Postgraduate Research Scholarship.  
56  
57  
58  
59  
60

1  
2  
3 **Contributors** LGHG was involved in drafting the manuscript, interpretation of data and revising the  
4 manuscript critically for important intellectual content. SSD conceived the study, performed the  
5 analysis and data interpretation and revised the manuscript critically for important intellectual content.  
6  
7 TAW participated in the study design, acquired the data and revised the manuscript critically for  
8 important intellectual content. All authors read and approved the final manuscript.  
9  
10  
11  
12

13  
14  
15 **Competing interests** None.  
16

17  
18  
19 **Funding** None.  
20

21  
22  
23 **Ethics approval** We have ethics approval for the use of the National Heart Foundation data from the  
24 Australian Institute of Health Interim Ethics Committee, after consultation with the Commonwealth  
25 Privacy Commissioner, and approval from the Human Research Ethics Committee at Curtin  
26 University. This study was carried out in accordance with the Declaration of Helsinki.  
27  
28  
29  
30  
31

32  
33 **Data sharing statement** No additional data are available.  
34  
35  
36  
37  
38  
39  
40  
41  
42  
43  
44  
45  
46  
47  
48  
49  
50  
51  
52  
53  
54  
55  
56  
57  
58  
59  
60

**REFERENCES**

1. Australian Bureau of Statistics (2012) 4364.0.55.001 - Australian health survey: First results, 2011-12. Canberra: ABS.
2. Sassi F, Devaux M, Cecchini M, Rusticelli E (2009) The Obesity Epidemic: Analysis of Past and Projected Future Trends in Selected OECD Countries, OECD Health Working Papers, No. 45, OECD Publishing.
3. National Health and Medical Research Council (2013) Clinical practice guidelines for the management of overweight and obesity in adults, adolescents and children in Australia. Melbourne: National Health and Medical Research Council.
4. Australian Bureau of Statistics (2008) 4719.0 - Overweight and obesity in adults 2004-05. Canberra: ABS.
5. O'Dea JA (2008) Gender, ethnicity, culture and social class influences on childhood obesity among Australian schoolchildren: implications for treatment, prevention and community education. *Health Soc Care Community* 16: 282-290.
6. Lear SA, Toma M, Birmingham CL, Frohlich JJ (2003) Modification of the relationship between simple anthropometric indices and risk factors by ethnic background. *Metabolism* 52: 1295-1301.
7. Zhang X, Shu XO, Gao Y-T, Yang G, Matthews CE, et al. (2004) Anthropometric predictors of coronary heart disease in Chinese women. *Int J Obes* 28: 734-740.
8. Huxley R, Mendis S, Zheleznyakov E, Reddy S, Chan J (2010) Body mass index, waist circumference and waist:hip ratio as predictors of cardiovascular risk—a review of the literature. *Eur J Clin Nutr* 64: 16-22.
9. Razak F, Anand S, Vuksan V, Davis B, Jacobs R, et al. (2005) Ethnic differences in the relationships between obesity and glucose-metabolic abnormalities: a cross-sectional population-based study. *Int J Obes* 29: 656-667.
10. Lee CMY, Huxley RR, Wildman RP, Woodward M (2008) Indices of abdominal obesity are better discriminators of cardiovascular risk factors than BMI: a meta-analysis. *J Clin Epidemiol* 61: 646-653.

- 1  
2  
3 11. Obesity in Asia Collaboration (2005) Ethnic comparisons of obesity in the Asia-Pacific region:  
4  
5 protocol for a collaborative overview of cross-sectional studies. *Obes Rev* 6: 193-198.  
6
- 7 12. Australian Risk Factor Prevalence Study Management Committee (1990) Survey No. 3 1989.  
8  
9 Canberra: National Heart Foundation of Australia and Australia Institute of Health.  
10
- 11 13. Boyle CA, Dobson AJ, Egger G, Benault SA (1993) Waist-to-hip ratios in Australia: A different  
12  
13 picture of obesity. *Aust J Nutr Diet* 50: 57-64.  
14
- 15 14. Alexander H, Dugdale A (1990) Which waist-hip ratio? *Med J Aust* 153: 367-368.  
16
- 17 15. Anderson KM, Odell PM, Wilson PW, Kannel WB (1991) Cardiovascular disease risk profiles.  
18  
19 *Am Heart J* 121: 293-298.  
20
- 21 16. Goh LGH, Dhaliwal SS, Lee AH, Bertolatti D, Della PR (2013) Utility of established  
22  
23 cardiovascular disease risk score models for the 10-year prediction of disease outcomes in  
24  
25 women. *Expert Rev Cardiovasc Ther* 11: 425-435.  
26
- 27 17. D'Agostino RB, Vasan RS, Pencina MJ, Wolf PA, Cobain M, et al. (2008) General cardiovascular  
28  
29 risk profile for use in primary care - The Framingham Heart Study. *Circulation* 117: 743-753.  
30
- 31 18. Mosca L, Benjamin EJ, Berra K, Bezanson JL, Dolor RJ, et al. (2011) Effectiveness-Based  
32  
33 Guidelines for the Prevention of Cardiovascular Disease in Women—2011 Update A  
34  
35 Guideline From the American Heart Association. *J Am Coll Cardiol* 57: 1404-1423.  
36
- 37 19. Genest J, McPherson R, Frohlich J, Anderson T, Campbell N, et al. (2009) 2009 Canadian  
38  
39 Cardiovascular Society/Canadian guidelines for the diagnosis and treatment of dyslipidemia  
40  
41 and prevention of cardiovascular disease in the adult – 2009 recommendations. *Can J Cardiol*  
42  
43 25: 567-579.  
44
- 45 20. Neil HAW, Perera R, Armitage JM, Farmer AJ, Mant D, et al. (2008) Estimated 10-year  
46  
47 cardiovascular risk in a British population: results of a national screening project. *Int J Clin*  
48  
49 *Pract* 62: 1322-1331.  
50
- 51 21. Woodward M, Brindle P, Tunstall-Pedoe H (2007) Adding social deprivation and family history  
52  
53 to cardiovascular risk assessment: the ASSIGN score from the Scottish Heart Health  
54  
55 Extended Cohort (SHHEC). *Heart* 93: 172-176.  
56  
57  
58  
59  
60

- 1  
2  
3 22. Welborn TA, Dhaliwal SS (2007) Preferred clinical measures of central obesity for predicting  
4 mortality. *Eur J Clin Nutr* 61: 1373-1379.  
5  
6  
7 23. Wei M, Gaskill SP, Haffner SM, Stern MP (1997) Waist circumference as the best predictor of  
8 noninsulin dependent diabetes mellitus (NIDDM) compared to body mass index, waist/hip  
9 ratio and other anthropometric measurements in Mexican Americans--a 7-year prospective  
10 study. *Obes Res* 5: 16-23.  
11  
12  
13 24. Janssen I, Katzmarzyk PT, Ross R (2004) Waist circumference and not body mass index explains  
14 obesity-related health risk. *Am J Clin Nutr* 79: 379-384.  
15  
16  
17 25. Bigaard J, Frederiksen K, Tjønneland A, Thomsen BL, Overvad K, et al. (2005) Waist  
18 circumference and body composition in relation to all-cause mortality in middle-aged men  
19 and women. *Int J Obes* 29: 778–784.  
20  
21  
22  
23  
24  
25 26. Roger VL, Go AS, Lloyd-Jones DM, Adams RJ, Berry JD, et al. (2011) Heart Disease and Stroke  
26 Statistics—2011 Update / 1. About 1. About These Statistics / 2. American Heart  
27 Association's 2020 Impact Goals / 3. Cardiovascular Diseases / 4. Subclinical Atherosclerosis  
28 / 5. Coronary Heart Disease, Acute Coronary Syndrome, and Angina Pectoris / 6. Stroke  
29 (Cerebrovascular Disease) / 7. High Blood Pressure / 8. Congenital Cardiovascular Defects /  
30 9. Cardiomyopathy and Heart Failure / 10. Other Cardiovascular Diseases / 11. Family  
31 History and Genetics / 12. Risk Factor: Smoking/Tobacco Use / 13. Risk Factor: High Blood  
32 Cholesterol and Other Lipids / 14. Risk Factor: Physical Inactivity / 15. Risk Factor:  
33 Overweight and Obesity / 16. Risk Factor: Diabetes Mellitus / 17. End-Stage Renal Disease  
34 and Chronic Kidney Disease / 18. Metabolic Syndrome / 19. Nutrition / 20. Quality of Care /  
35 21. Medical Procedures / 22. Economic Cost of Cardiovascular Disease / 23. At-a-Glance  
36 Summary Tables / 24. Glossary. *Circulation* 123: e18-e209.  
37  
38  
39  
40  
41  
42  
43  
44  
45  
46  
47  
48  
49  
50 27. Dhaliwal SS, Welborn TA (2009) Measurement error and ethnic comparisons of measures of  
51 abdominal obesity. *Prev Med* 49: 148-152.  
52  
53  
54 28. Herrera VM, Casas JP, Miranda JJ, Perel P, Pichardo R, et al. (2009) Interethnic differences in the  
55 accuracy of anthropometric indicators of obesity in screening for high risk of coronary heart  
56 disease. *Int J Obes* 33: 568–576.  
57  
58  
59  
60



- 1  
2  
3 29. Yusuf S, Hawken S, Ôunpuu S, Bautista L, Franzosi MG, et al. (2005) Obesity and the risk of  
4 myocardial infarction in 27□000 participants from 52 countries: a case-control study. *Lancet*  
5 366: 1640-1649.  
6  
7  
8  
9 30. de Koning L, Merchant AT, Pogue J, Anand SS (2007) Waist circumference and waist-to-hip ratio  
10 as predictors of cardiovascular events: meta-regression analysis of prospective studies. *Eur*  
11 *Heart J* 28: 850-856.  
12  
13 31. See R, Abdullah SM, McGuire DK, Khera A, Patel MJ, et al. (2007) The Association of Differing  
14 Measures of Overweight and Obesity With Prevalent Atherosclerosis: The Dallas Heart  
15 Study. *J Am Coll Cardiol* 50: 752-759.  
16  
17 32. Welborn TA, Dhaliwal SS, Bennett SA (2003) Waist-hip ratio is the dominant risk factor  
18 predicting cardiovascular death in Australia. *Med J Aust* 179: 580-585.  
19  
20 33. Dhaliwal SS, Welborn TA (2009) Central obesity and multivariable cardiovascular risk as  
21 assessed by the Framingham prediction scores. *Am J Cardiol* 103: 1403-1407.  
22  
23 34. Ulijaszek SJ, Kerr DA (1999) Anthropometric measurement error and the assessment of  
24 nutritional status. *Br J Nutr* 82: 165-177.  
25  
26 35. Sebo P, Beer-Borst S, Haller DM, Bovier PA (2008) Reliability of doctors' anthropometric  
27 measurements to detect obesity. *Prev Med* 47: 389-393.  
28  
29 36. Goodman-Gruen D, Barrett-Connor E (1996) Sex Differences in Measures of Body Fat and Body  
30 Fat Distribution in the Elderly. *Am J Epidemiol* 143: 898-906.  
31  
32 37. Turcato E, Bosello O, Di Francesco V, Harris TB, Zoico E, et al. (2000) Waist circumference and  
33 abdominal sagittal diameter as surrogates of body fat distribution in the elderly: their relation  
34 with cardiovascular risk factors. *Int J Obes Relat Metab Disord* 24: 1005-1010.  
35  
36 38. Caan B, Armstrong MA, Selby JV, Sadler M, Folsom AR, et al. (1994) Changes in measurements  
37 of body fat distribution accompanying weight change. *Int J Obes Relat Metab Disord* 18: 397-  
38 404.  
39  
40 39. Ho SC, Chen YM, Woo JLF, Leunga SSF, Lam THJ, E D. (2001) Association between simple  
41 anthropometric indices and cardiovascular risk factors. *Int J Obes Relat Metab Disord* 25:  
42 1689-1697.  
43  
44  
45  
46  
47  
48  
49  
50  
51  
52  
53  
54  
55  
56  
57  
58  
59  
60

- 1  
2  
3 40. Li G, Chen X, Jang Y, Wang J, Xing X, et al. (2002) Obesity, coronary heart disease risk factors  
4 and diabetes in Chinese: an approach to the criteria of obesity in the Chinese population.  
5 Obesity Reviews 3: 167-172.  
6  
7  
8  
9 41. Tan C-E, Ma S, Wai D, Chew S-K, Tai E-S (2004) Can We Apply the National Cholesterol  
10 Education Program Adult Treatment Panel Definition of the Metabolic Syndrome to Asians?  
11 Diabetes Care 27: 1182-1186.  
12  
13  
14  
15 42. Kohli S, Sniderman AD, Tchernof A, Lear SA (2010) Ethnic-specific differences in abdominal  
16 subcutaneous adipose tissue compartments. Obesity 18: 2177-2183.  
17  
18  
19 43. Wang Y, Beydoun MA (2007) The Obesity Epidemic in the United States—Gender, Age,  
20 Socioeconomic, Racial/Ethnic, and Geographic Characteristics: A Systematic Review and  
21 Meta-Regression Analysis. Epidemiol Rev 29: 6-28.  
22  
23  
24  
25  
26  
27  
28  
29  
30  
31  
32  
33  
34  
35  
36  
37  
38  
39  
40  
41  
42  
43  
44  
45  
46  
47  
48  
49  
50  
51  
52  
53  
54  
55  
56  
57  
58  
59  
60

STROBE 2007 (v4) Statement—Checklist of items that should be included in reports of *cross-sectional studies*

| Section/Topic                | Item # | Recommendation                                                                                                                                                                       | Reported on page # |
|------------------------------|--------|--------------------------------------------------------------------------------------------------------------------------------------------------------------------------------------|--------------------|
| Title and abstract           | 1      | (a) Indicate the study's design with a commonly used term in the title or the abstract                                                                                               | 1                  |
|                              |        | (b) Provide in the abstract an informative and balanced summary of what was done and what was found                                                                                  | 2                  |
| <b>Introduction</b>          |        |                                                                                                                                                                                      |                    |
| Background/rationale         | 2      | Explain the scientific background and rationale for the investigation being reported                                                                                                 | 5                  |
| Objectives                   | 3      | State specific objectives, including any prespecified hypotheses                                                                                                                     | 5-6                |
| <b>Methods</b>               |        |                                                                                                                                                                                      |                    |
| Study design                 | 4      | Present key elements of study design early in the paper                                                                                                                              | 6                  |
| Setting                      | 5      | Describe the setting, locations, and relevant dates, including periods of recruitment, exposure, follow-up, and data collection                                                      | 6                  |
| Participants                 | 6      | (a) Give the eligibility criteria, and the sources and methods of selection of participants                                                                                          | 6                  |
| Variables                    | 7      | Clearly define all outcomes, exposures, predictors, potential confounders, and effect modifiers. Give diagnostic criteria, if applicable                                             | 6                  |
| Data sources/<br>measurement | 8*     | For each variable of interest, give sources of data and details of methods of assessment (measurement). Describe comparability of assessment methods if there is more than one group | 6-7                |
| Bias                         | 9      | Describe any efforts to address potential sources of bias                                                                                                                            | 6-7                |
| Study size                   | 10     | Explain how the study size was arrived at                                                                                                                                            | N.A.               |
| Quantitative variables       | 11     | Explain how quantitative variables were handled in the analyses. If applicable, describe which groupings were chosen and why                                                         | 8                  |
| Statistical methods          | 12     | (a) Describe all statistical methods, including those used to control for confounding                                                                                                | 8                  |
|                              |        | (b) Describe any methods used to examine subgroups and interactions                                                                                                                  | N.A.               |
|                              |        | (c) Explain how missing data were addressed                                                                                                                                          | N.A.               |
|                              |        | (d) If applicable, describe analytical methods taking account of sampling strategy                                                                                                   | N.A.               |
|                              |        | (e) Describe any sensitivity analyses                                                                                                                                                | N.A.               |
| <b>Results</b>               |        |                                                                                                                                                                                      |                    |

|                          |     |                                                                                                                                                                                                              |         |
|--------------------------|-----|--------------------------------------------------------------------------------------------------------------------------------------------------------------------------------------------------------------|---------|
| Participants             | 13* | (a) Report numbers of individuals at each stage of study—eg numbers potentially eligible, examined for eligibility, confirmed eligible, included in the study, completing follow-up, and analysed            | 8-9,11  |
|                          |     | (b) Give reasons for non-participation at each stage                                                                                                                                                         | N.A.    |
|                          |     | (c) Consider use of a flow diagram                                                                                                                                                                           | N.A.    |
| Descriptive data         | 14* | (a) Give characteristics of study participants (eg demographic, clinical, social) and information on exposures and potential confounders                                                                     | 8-9,11  |
|                          |     | (b) Indicate number of participants with missing data for each variable of interest                                                                                                                          | N.A.    |
| Outcome data             | 15* | Report numbers of outcome events or summary measures                                                                                                                                                         | 8-16    |
| Main results             | 16  | (a) Give unadjusted estimates and, if applicable, confounder-adjusted estimates and their precision (eg, 95% confidence interval). Make clear which confounders were adjusted for and why they were included | 8-16    |
|                          |     | (b) Report category boundaries when continuous variables were categorized                                                                                                                                    | 8-16    |
|                          |     | (c) If relevant, consider translating estimates of relative risk into absolute risk for a meaningful time period                                                                                             | N.A.    |
| Other analyses           | 17  | Report other analyses done—eg analyses of subgroups and interactions, and sensitivity analyses                                                                                                               | 9,15-16 |
| <b>Discussion</b>        |     |                                                                                                                                                                                                              |         |
| Key results              | 18  | Summarise key results with reference to study objectives                                                                                                                                                     | 17      |
| Limitations              | 19  | Discuss limitations of the study, taking into account sources of potential bias or imprecision. Discuss both direction and magnitude of any potential bias                                                   | 19      |
| Interpretation           | 20  | Give a cautious overall interpretation of results considering objectives, limitations, multiplicity of analyses, results from similar studies, and other relevant evidence                                   | 19      |
| Generalisability         | 21  | Discuss the generalisability (external validity) of the study results                                                                                                                                        | 19      |
| <b>Other information</b> |     |                                                                                                                                                                                                              |         |
| Funding                  | 22  | Give the source of funding and the role of the funders for the present study and, if applicable, for the original study on which the present article is based                                                | N.A.    |

\*Give information separately for cases and controls in case-control studies and, if applicable, for exposed and unexposed groups in cohort and cross-sectional studies.

**Note:** An Explanation and Elaboration article discusses each checklist item and gives methodological background and published examples of transparent reporting. The STROBE checklist is best used in conjunction with this article (freely available on the Web sites of PLoS Medicine at <http://www.plosmedicine.org/>, Annals of Internal Medicine at <http://www.annals.org/>, and Epidemiology at <http://www.epidem.com/>). Information on the STROBE Initiative is available at [www.strobe-statement.org](http://www.strobe-statement.org).

# BMJ Open

## Ethnicity and the association between anthropometric indices of obesity and cardiovascular risk in women: a cross-sectional study

|                                 |                                                                                                                                                                                                                                                                                                                             |
|---------------------------------|-----------------------------------------------------------------------------------------------------------------------------------------------------------------------------------------------------------------------------------------------------------------------------------------------------------------------------|
| Journal:                        | <i>BMJ Open</i>                                                                                                                                                                                                                                                                                                             |
| Manuscript ID:                  | bmjopen-2013-004702.R1                                                                                                                                                                                                                                                                                                      |
| Article Type:                   | Research                                                                                                                                                                                                                                                                                                                    |
| Date Submitted by the Author:   | 07-Apr-2014                                                                                                                                                                                                                                                                                                                 |
| Complete List of Authors:       | Goh, Louise; Curtin University, School of Public Health<br>Dhaliwal, Satvinder; Curtin University, School of Public Health<br>Welborn, Timothy; Sir Charles Gairdner Hospital, Endocrinology<br>Lee, Andy; Curtin University, School of Public Health<br>Della, Phillip; Curtin University, School of Nursing and Midwifery |
| <b>Primary Subject Heading</b>: | Public health                                                                                                                                                                                                                                                                                                               |
| Secondary Subject Heading:      | Epidemiology                                                                                                                                                                                                                                                                                                                |
| Keywords:                       | PUBLIC HEALTH, EPIDEMIOLOGY, CARDIOLOGY                                                                                                                                                                                                                                                                                     |
|                                 |                                                                                                                                                                                                                                                                                                                             |

SCHOLARONE™  
Manuscripts

1  
2  
3 **Ethnicity and the association between anthropometric indices of**  
4  
5  
6 **obesity and cardiovascular risk in women: a cross-sectional study**  
7  
8  
9

10  
11 Correspondence to: Professor Satvinder S Dhaliwal

12  
13 School of Public Health, Curtin Health Innovation Research Institute, Curtin University, GPO Box  
14  
15 U1987, Perth, WA 6845, Australia

16  
17 Tel: +618 9266 2949

18  
19 Fax: +618 9266 2958

20  
21 E-mail: [s.dhaliwal@curtin.edu.au](mailto:s.dhaliwal@curtin.edu.au)  
22  
23

24  
25 Louise GH Goh,<sup>1</sup> Satvinder S Dhaliwal,<sup>1</sup> Timothy A Welborn,<sup>2</sup> Andy H Lee,<sup>1</sup> Phillip R Della<sup>3</sup>  
26  
27

28  
29 <sup>1</sup>School of Public Health, Curtin Health Innovation Research Institute, Curtin University, GPO Box  
30  
31 U1987, Perth, WA 6845, Australia  
32

33  
34 <sup>2</sup>Sir Charles Gairdner Hospital, Hospital Avenue, Nedlands, Perth, WA 6009, Australia

35  
36 <sup>3</sup>School of Nursing and Midwifery, Curtin Health Innovation Research Institute, Curtin University,  
37  
38 GPO Box U1987, Perth, WA 6845, Australia  
39

40  
41 Ethnicity, obesity and cardiovascular risk  
42  
43  
44

45  
46 Keywords: Obesity, epidemiology, cardiovascular diseases, prevention and women  
47  
48  
49  
50  
51  
52  
53  
54  
55  
56  
57  
58  
59  
60

**ABSTRACT**

**Objectives:** The objectives of this study were to determine whether the cross-sectional associations between anthropometric obesity measures, body mass index (BMI), waist circumference (WC) and waist-to-hip ratio (WHR), and calculated 10-year cardiovascular disease (CVD) risk using the Framingham and general CVD risk score models, is the same for women of Australian, United Kingdom and Ireland, North European, South European and Asian descent. This study would investigate which anthropometric obesity measure is most predictive at identifying women at increased CVD risk in each ethnic group.

**Design:** Cross-sectional data from the National Heart Foundation Risk Factor Prevalence Study.

**Setting:** Population-based survey in Australia.

**Participants:** 4354 women aged 20-69 years with no previous history of heart disease, diabetes or stroke. Most participants were of Australian, United Kingdom and Ireland, North European, South European or Asian descent (97%).

**Outcome measures:** Anthropometric obesity measures that demonstrated stronger predictive ability of identifying women at increased CVD risk and likelihood of being above the promulgated treatment thresholds of various risk score models.

**Results:** Central obesity measures, WC, WHR, were better predictors of cardiovascular risk. WHR reported stronger predictive ability than WC and BMI in Caucasian women. In Northern European women, BMI was a better indicator of risk using the general CVD (10% threshold) and Framingham (20% threshold) risk score models. WC was the most predictive of cardiovascular risk among Asian women.

1  
2  
3 **Conclusions:** Ethnicity should be incorporated into CVD assessment. The same anthropometric  
4 obesity measure cannot be used across all ethnic groups. Ethnic-specific CVD prevention and  
5 treatment strategies need to be further developed.  
6  
7  
8  
9  
10  
11  
12  
13  
14  
15  
16  
17  
18  
19  
20  
21  
22  
23  
24  
25  
26  
27  
28  
29  
30  
31  
32  
33  
34  
35  
36  
37  
38  
39  
40  
41  
42  
43  
44  
45  
46  
47  
48  
49  
50  
51  
52  
53  
54  
55  
56  
57  
58  
59  
60

For peer review only



## ARTICLE SUMMARY

### Strengths and limitations of this study

- This study confirms that ethnicity influences the association between anthropometric obesity measures and CVD risk.
- Central obesity measures such as WC and WHR are better indicators of CVD risk compared to BMI across ethnic groups.
- The treatment threshold used for a risk score model affects the predictive ability of anthropometric obesity measures and the same cut-point may not be suitable across ethnic groups.
- It is a cross-sectional study of the Australian female population in 1989 and these results require confirmation from prospective studies.
- Due to a sample size of about 200 for the Asian population, different regions in Asia could not be compared.
- The CVD risk was estimated using risk score models in order to stratify individuals above and below the respective treatment thresholds and not actual CVD events.

## INTRODUCTION

In Australia, approximately 63% of adults were overweight and obese in 2011-2012.<sup>1</sup> The proportion of the Australian population who are overweight and obese is expected to increase to approximately 66% in the next five years.<sup>2</sup> The National Health and Medical Research Council have developed Clinical Practice Guidelines for the Management of Overweight and Obesity for Adults, Adolescents and Children in Australia to provide guidance on assessing and managing obesity.<sup>3</sup>

Overweight and obesity affects all socioeconomic groups in Australia, but it is more prevalent in some ethnic groups.<sup>4,5</sup> Variations exist in the associations between excess weight and obesity-related conditions among different racial and ethnic groups. Ethnicity significantly affects the associations between anthropometric indices used to assess adiposity such as body mass index (BMI) and waist circumference (WC), and cardiovascular disease (CVD) risk factors.<sup>6</sup>

Previous epidemiological studies which assessed the associations between anthropometric indices of obesity and CVD were mostly conducted in Western societies.<sup>7</sup> It is thus not clear which anthropometric obesity measures are more strongly associated with CVD risk in different ethnic groups.<sup>8</sup> To address this, it is necessary to examine the relationship between anthropometric obesity measures and CVD risk by ethnicity and this has been proposed in previous studies as well.<sup>9-11</sup> These fundamental issues need to be addressed in order to recommend effective weight management and disease prevention strategies to reduce the burden associated with overweight and obesity in all population groups.

The objectives of this study were to determine whether the cross-sectional associations between anthropometric obesity measures (BMI, WC and waist-to-hip ratio) and calculated 10-year CVD risk using the Framingham and general CVD risk score models, is the same for women of Australian, United Kingdom and Ireland, North European, South European and Asian descent. This study would investigate which anthropometric obesity measure is most predictive at identifying women at increased CVD risk in each ethnic group.

## METHODS

### Study participants

Participants were selected from the third Risk Factor Prevalence Study<sup>12</sup> conducted by the National Heart Foundation (NHF) of Australia in 1989. Residents on the federal electoral rolls of December 1988 in North and South Sydney, Melbourne, Brisbane, Adelaide, Perth, Hobart, Darwin and Canberra were recruited for the Risk Factor Prevalence Study by systemic probability sampling of sex and 5-year age groups. Complete data were available on 4727 women. Country of birth was used as a surrogate for ethnicity and grouped into regions.<sup>12</sup> Most participants were of Australian, United Kingdom and Ireland, North European, South European or Asian descent (97%). We selected a representative sample of 4354 women aged 20-69 years with no previous history of heart disease, diabetes or stroke for analysis. There were 3329 Australian women, 416 women from the United Kingdom and Ireland, 180 Northern European women, 234 Southern European women and 195 Asian women. Further details have been described in the third Risk Factor Prevalence Study and in a previous study.<sup>12 13</sup>

### Ethics statement

Ethical approval for the NHF data was obtained in advance from the Australian Institute of Health Interim Ethics Committee, after consultation with the Commonwealth Privacy Commissioner. Participation was entirely voluntary. Those who participated signed an informed consent form.<sup>12</sup> Participant information was anonymized prior to analysis. This study was approved by the Human Research Ethics Committee at Curtin University, and complies with the Declaration of Helsinki.

### Anthropometry

A single record of height (to the nearest centimetre) and weight (to the nearest 10<sup>th</sup> of a kilogram) was taken in light summer clothes without shoes. BMI was calculated based on weight in kilograms divided by square of height in meters. Waist and hip circumferences were measured according to standardized methodologies by trained anthropometrists.<sup>14 15</sup> The WC was measured from the front at the narrowest point between the rib cage and iliac crest after full expiration while the hip

1  
2  
3 circumference (HC) was measured from the side at the maximal extension of buttocks by one  
4  
5 observer using a metal tape. A second observer recorded another set of measurements and ensured  
6  
7 that the metal tape was kept strictly horizontal at all times. The mean of two measurements was taken  
8  
9 at each site to the nearest centimetre. The waist-to-hip ratio (WHR) was calculated based on WC  
10  
11 divided by the HC. Information on demographic characteristics, medical conditions and smoking  
12  
13 behaviour were collected. Mercury sphygmomanometers were used to record blood pressure levels on  
14  
15 the right arm of seated participants five minutes apart.<sup>12</sup> Two readings were taken and the average was  
16  
17 used in the analysis. Fasting blood samples were collected in EDTA tubes and despatched to the  
18  
19 central laboratory at the Division of Clinical Chemistry, Institute of Medical and Veterinary Science,  
20  
21 Adelaide each week for cholesterol levels to be assayed.  
22  
23

### 24 25 **Risk score models**

26  
27 The Framingham risk score model<sup>16</sup> predicts the 10-year CVD incidence. It was developed from the  
28  
29 American Framingham Heart Study using participants aged 30-74 years who were free of CVD and  
30  
31 cancer. Risk variables used to calculate the 10-year risk include, age, sex, systolic blood pressure  
32  
33 (SBP), diastolic blood pressure, total cholesterol level, high-density lipoprotein (HDL) cholesterol  
34  
35 level, smoking status, diabetes status and electrocardiogram-left ventricular hypertrophy (ECG-  
36  
37 LVH).<sup>16</sup> The most commonly used treatment threshold for the Framingham model was 20%,<sup>17</sup> this  
38  
39 denotes that an individual who has a risk score of more than 20% is considered to be at increased risk  
40  
41 of experiencing a CVD event within the next 10 years and should be targeted for treatment.  
42  
43  
44

45  
46 Although the general CVD risk score model for predicting the 10-year CVD incidence and death was  
47  
48 also developed based on data from the American Framingham Heart Study, it was developed from a  
49  
50 larger cohort and consisted of participants without CVD only.<sup>18</sup> The general CVD risk score model  
51  
52 contains these variables, age, total cholesterol level, HDL cholesterol level, SBP, current  
53  
54 antihypertensive treatment, smoking status and diabetes status.<sup>18</sup> Treatment thresholds of 10% and  
55  
56 20% were reported for this model.<sup>18 19</sup>  
57  
58  
59  
60

### Statistical analysis

Demographic and clinical characteristics of the sample were described using mean  $\pm$  standard deviation for continuous variables, while counts (percentages) were used for categorical variables. Comparisons between means of continuous variables were conducted using Analysis of Variance, with age as a covariate, and with Bonferroni adjustment for multiple comparisons. Means with different superscripts were significantly different at the 5% level of significance. Non-parametric Spearman's rank correlation was used to assess the associations between BMI, WC and WHR and the 10-year predicted CVD risk calculated using Framingham and general CVD risk score models by ethnicity, due to the skewness in the distribution of risk variables. These measures were also converted to z-scores (original value subtracted by the mean and the result divided by the standard deviation) to represent the number of standard deviations above and below the mean of each anthropometric obesity measure for each individual. Logistic regression was used to assess the effects of each standardised obesity measure of being above the recommended treatment threshold for the respective risk score models (10% and 20%), as a result of a one standard deviation increment above the mean of each measure of obesity, by ethnicity. These effects were represented using odds-ratios and associated 95% confidence intervals. The predictive ability of these anthropometric obesity measures to identify individuals from different ethnic groups above the treatment threshold of 20% for the Framingham model for 10-year CVD incidence, and 10% and 20% for the general CVD risk score model for 10-year CVD incidence and death was assessed using the area under the receiver operating characteristic (ROC) curve. Ethnic-specific cut-off values of the anthropometric obesity measures and associated level of specificity to predict increased risk of CVD at 70% and 80% sensitivity were also presented. P-values of less than 0.05 were considered to be statistically significant. All statistical analyses were performed with IBM SPSS Statistics Version 21.

### RESULTS

The demographic and clinical characteristics of the multi-ethnic sample of 4354 women without heart disease, diabetes or stroke are presented in Table 1. Southern European women generally had higher

1  
2  
3 BMI, WC and WHR compared to other ethnic groups, and Asian women had lower anthropometric  
4  
5 obesity measures.  
6  
7

8  
9 All Spearman's rank correlations were statistically significant ( $p < 0.0005$ ). Overall, WC appeared to  
10  
11 have a stronger association with the 10-year predicted risk calculated using the general CVD and  
12  
13 Framingham risk score models across all ethnic groups except in European women (Table 2). BMI  
14  
15 appeared to be more associated with CVD risk calculated using both models in Northern European  
16  
17 women while WHR was more associated with the predicted risk in Southern European women.  
18  
19

20  
21 The recommended treatment thresholds for the general CVD risk score model at 10% and 20%, and  
22  
23 the Framingham risk score model at 20% were identified from a review of the literature. Table 3a  
24  
25 presents the effects of a one standard deviation increment in BMI, WC and WHR above the mean on  
26  
27 the likelihood of being above the recommended threshold in each ethnic group. Increase in  
28  
29 anthropometric measurements was generally associated with an increased likelihood of being above  
30  
31 the treatment thresholds for all models. A one standard deviation change in all obesity measures in  
32  
33 Asian women did not have a significant effect on the CVD risk as calculated using the general CVD  
34  
35 model both at the 10% and 20% threshold. BMI was not effective in predicting the likelihood of being  
36  
37 above the treatment threshold across all models for Southern European women.  
38  
39

40  
41 Table 3b summarises the results in Table 3a by presenting only statistically significant anthropometric  
42  
43 obesity measures which increase the likelihood of individuals being above the treatment threshold,  
44  
45 with measures of obesity ordered corresponding to odds-ratios, from the highest to lowest. WHR  
46  
47 generally recorded higher odds-ratios than WC and BMI and increased the likelihood of individuals of  
48  
49 different ethnicity being above the respective treatment thresholds of the respective models. Only  
50  
51 BMI presented higher odds-ratios and increased the likelihood of Northern European women being  
52  
53 indicated for treatment based on the predicted risk calculated from the general CVD model at the 10%  
54  
55 threshold but not 20% threshold and Framingham model at the 20% threshold. WC recorded higher  
56  
57 odds-ratios in Asian women using the Framingham model at the 20% threshold.  
58  
59  
60

1  
2  
3 Higher area under the ROC curve, sensitivity and specificity were recorded with WHR in predicting  
4 the 10-year CVD risk calculated using the general CVD and Framingham risk score models across  
5 most ethnic groups (Table 4). The highest area under the ROC curve and specificity value at 80%  
6 sensitivity for WHR was 0.866 and 84.9% for Northern European women with the general CVD  
7 model at the 20% threshold.  
8  
9  
10  
11  
12

13  
14  
15 In Northern European women, BMI was a better predictor of CVD risk calculated using the general  
16 CVD risk score model at the 10% threshold but not 20% threshold and the Framingham risk score  
17 model at the 20% threshold, compared with WC and WHR. WHR, however, was the better indicator  
18 of CVD risk using the general CVD risk score model with a 20% threshold, in Northern European  
19 women. In Asian women, WC reported consistently higher area under the ROC curve, sensitivity and  
20 specificity across all CVD models and thresholds. The area under the ROC curve values ranged from  
21 0.630 to 0.688 and specificity values ranged from 50.5% to 53.3% at 80% sensitivity in Asian women.  
22  
23 The cut-off values for BMI, WC and WHR are also presented in Table 4. A WHR value of 0.75  
24 would indicate increased CVD risk for women from Australia and United Kingdom and Ireland while  
25 a value of 0.78 would indicate increased risk for Southern European women. In Asian women, a WC  
26 of 71.8 cm would indicate increased CVD risk. A BMI of 24.4 kg/m<sup>2</sup> would indicate increased risk in  
27 Northern European women. The diagnostic abilities of the various anthropometric obesity measures to  
28 identify women as being above the threshold and hence identified for treatment varies according to  
29 ethnic groups.  
30  
31  
32  
33  
34  
35  
36  
37  
38  
39  
40  
41  
42  
43  
44  
45  
46  
47  
48  
49  
50  
51  
52  
53  
54  
55  
56  
57  
58  
59  
60

**Table 1 Characteristics of the sample of 4354 women without heart disease, diabetes or stroke by ethnicity**

|                               | Statistics | Australia                | UK and Ireland            | Northern Europe            | Southern Europe          | Asia                       |
|-------------------------------|------------|--------------------------|---------------------------|----------------------------|--------------------------|----------------------------|
| <b>Count</b>                  | N          | 3329                     | 416                       | 180                        | 234                      | 195                        |
| <b>Age (years)</b>            | Mean ± SD  | 41.9 ± 13.5              | 45.7 ± 12.5               | 49.0 ± 11.7                | 47.8 ± 10.6              | 40.5 ± 10.9                |
| <b>Current smoker (Yes)</b>   | n (%)      | 751 (22.6%)              | 91 (21.9%)                | 39 (21.7%)                 | 32 (13.7%)               | 19 (9.7%)                  |
| <b>Weight (kg)</b>            | Mean ± SD  | 65.4 ± 12.6 <sup>a</sup> | 65.2 ± 12.0 <sup>a</sup>  | 66.5 ± 12.6 <sup>a</sup>   | 66.9 ± 11.8 <sup>a</sup> | 58.6 ± 11.6 <sup>b</sup>   |
| <b>Height (cm)</b>            | Mean ± SD  | 162.8 ± 6.0 <sup>a</sup> | 162.3 ± 6.2 <sup>a</sup>  | 161.9 ± 6.2 <sup>a</sup>   | 156.8 ± 6.1 <sup>b</sup> | 156.7 ± 5.7 <sup>b</sup>   |
| <b>BMI (kg/m<sup>2</sup>)</b> | Mean ± SD  | 24.7 ± 4.8 <sup>b</sup>  | 24.7 ± 4.2 <sup>b,c</sup> | 25.4 ± 4.6 <sup>b,d</sup>  | 27.2 ± 4.4 <sup>a</sup>  | 23.8 ± 4.3 <sup>c,d</sup>  |
| <b>WC (cm)</b>                | Mean ± SD  | 75.9 ± 11.0 <sup>b</sup> | 76.2 ± 10.5 <sup>b</sup>  | 78.4 ± 11.9 <sup>b</sup>   | 81.2 ± 11.0 <sup>a</sup> | 73.9 ± 10.4 <sup>b</sup>   |
| <b>WHR</b>                    | Mean ± SD  | 0.76 ± 0.06 <sup>c</sup> | 0.76 ± 0.06 <sup>c</sup>  | 0.77 ± 0.07 <sup>b,c</sup> | 0.79 ± 0.06 <sup>a</sup> | 0.77 ± 0.06 <sup>a,b</sup> |
| <b>SBP (mmHg)</b>             | Mean ± SD  | 122 ± 18 <sup>a</sup>    | 123 ± 18 <sup>b,c</sup>   | 126 ± 19 <sup>a,b,c</sup>  | 127 ± 19 <sup>a,b</sup>  | 116 ± 19 <sup>c</sup>      |
| <b>HDL (mmol/L)</b>           | Mean ± SD  | 1.5 ± 0.4 <sup>a</sup>   | 1.5 ± 0.4 <sup>a</sup>    | 1.5 ± 0.4 <sup>a</sup>     | 1.4 ± 0.3 <sup>b</sup>   | 1.4 ± 0.4 <sup>a,b</sup>   |
| <b>TC (mmol/L)</b>            | Mean ± SD  | 5.4 ± 1.1                | 5.6 ± 1.2                 | 5.7 ± 1.3                  | 5.7 ± 1.1                | 5.2 ± 1.0                  |
| <b>Ratio: HDL to TC</b>       | Mean ± SD  | 3.9 ± 1.3 <sup>b</sup>   | 4.0 ± 1.4 <sup>a,b</sup>  | 4.0 ± 1.4 <sup>b</sup>     | 4.3 ± 1.4 <sup>a</sup>   | 3.9 ± 1.2 <sup>a,b</sup>   |

<sup>a,b,c,d</sup> Means with different superscripts were significantly different at the 5% level of significance, after adjusting for age.

Abbreviations: BMI, body mass index; WC, waist circumference; WHR, waist-to-hip ratio; SBP, systolic blood pressure; HDL, high-density lipoprotein cholesterol; TC, total cholesterol.



**Table 2 Non-parametric correlations between anthropometric measurements of general and central obesity and 10-year predicted risk of CVD incidence and mortality by ethnicity in 4354 women**

| Ethnicity                                                             | BMI   | WC    | WHR   |
|-----------------------------------------------------------------------|-------|-------|-------|
| <i>General CVD 10-year predicted risk for CVD incidence and death</i> |       |       |       |
| Australia                                                             | 0.372 | 0.443 | 0.402 |
| UK and Ireland                                                        | 0.360 | 0.406 | 0.365 |
| Northern Europe                                                       | 0.504 | 0.462 | 0.435 |
| Southern Europe                                                       | 0.356 | 0.479 | 0.485 |
| Asia                                                                  | 0.306 | 0.396 | 0.308 |
| Overall                                                               | 0.384 | 0.451 | 0.408 |
| <i>Framingham 10-year predicted risk for CVD incidence</i>            |       |       |       |
| Australia                                                             | 0.366 | 0.440 | 0.405 |
| UK and Ireland                                                        | 0.349 | 0.399 | 0.361 |
| Northern Europe                                                       | 0.500 | 0.464 | 0.445 |
| Southern Europe                                                       | 0.358 | 0.483 | 0.491 |
| Asia                                                                  | 0.311 | 0.402 | 0.308 |
| Overall                                                               | 0.380 | 0.449 | 0.412 |

All Spearman's rank correlations significant at the  $p < 0.0005$  level

Abbreviations: BMI, body mass index; WC, waist circumference; WHR, waist-to-hip ratio.

**Table 3a Odds-ratios and associated 95% confidence intervals of being above the recommended treatment threshold for various risk score models as a result of a 1 standard deviation increment above the mean for each anthropometric measure of obesity by ethnicity**

| Ethnicity                                                                                               | BMI                             | WC                    | WHR                   |
|---------------------------------------------------------------------------------------------------------|---------------------------------|-----------------------|-----------------------|
| <i>General CVD 10-year predicted risk for CVD incidence and death (threshold = 10%)<sup>19</sup></i>    |                                 |                       |                       |
| Australia                                                                                               | 1.69*** (1.55 - 1.85)           | 2.16*** (1.96 - 2.38) | 2.36*** (2.13 - 2.62) |
| UK and Ireland                                                                                          | 1.71*** (1.29 - 2.25)           | 1.86*** (1.42 - 2.43) | 2.09*** (1.58 - 2.75) |
| Northern Europe                                                                                         | 2.50*** (1.67 - 3.74)           | 2.28*** (1.61 - 3.24) | 2.23*** (1.55 - 3.21) |
| Southern Europe                                                                                         | 1.37 (0.97 - 1.94)              | 1.64** (1.18 - 2.28)  | 1.89** (1.32 - 2.70)  |
| Asia                                                                                                    | 1.14 (0.62 - 2.09)              | 1.57 (0.97 - 2.56)    | 1.48 (0.88 - 2.47)    |
| <i>General CVD 10-year predicted risk for CVD incidence and death (threshold = 20%)<sup>18 20</sup></i> |                                 |                       |                       |
| Australia                                                                                               | 1.65*** (1.43 - 1.91)           | 2.07*** (1.78 - 2.41) | 2.11*** (1.80 - 2.47) |
| UK and Ireland                                                                                          | 1.12 (0.64 - 1.96)              | 1.22 (0.73 - 2.05)    | 1.68* (1.05 - 2.69)   |
| Northern Europe                                                                                         | 2.60** (1.44 - 4.70)            | 2.76*** (1.58 - 4.80) | 3.23*** (1.74 - 5.97) |
| Southern Europe                                                                                         | 1.17 (0.58 - 2.35)              | 1.77 (0.96 - 3.28)    | 2.15* (1.11 - 4.18)   |
| Asia                                                                                                    | 0.96 (0.19 - 4.94)              | 1.15 (0.29 - 4.57)    | 0.71 (0.13 - 3.92)    |
| <i>Framingham 10-year predicted risk for CVD incidence (threshold = 20%)<sup>21 22</sup></i>            |                                 |                       |                       |
| Australia                                                                                               | 1.67*** (1.52 - 1.82)           | 2.13*** (1.94 - 2.34) | 2.37*** (2.14 - 2.63) |
| UK and Ireland                                                                                          | 1.71*** (1.30 - 2.25)           | 1.88*** (1.45 - 2.45) | 2.16*** (1.64 - 2.85) |
| Northern Europe                                                                                         | 2.55*** (1.70 - 3.85)           | 2.27*** (1.59 - 3.23) | 2.33*** (1.60 - 3.40) |
| Southern Europe                                                                                         | 1.32 (0.94 - 1.84)              | 1.67** (1.21 - 2.30)  | 2.07*** (1.45 - 2.95) |
| Asia                                                                                                    | 1.65 <sup>#</sup> (0.99 - 2.76) | 1.89** (1.20 - 2.97)  | 1.63* (1.02 - 2.61)   |

\*  $p < 0.05$ , \*\*  $p < 0.01$ , \*\*\*  $p < 0.001$ , <sup>#</sup>  $p = 0.054$

Abbreviations: BMI, body mass index; WC, waist circumference; WHR, waist-to-hip ratio.

**Table 3b Significant anthropometric measurements of general and central obesity and 10-year predicted risk of CVD incidence and mortality by ethnicity**

| Ethnicity                   | General CVD<br>(threshold = 10%) | General CVD<br>(threshold = 20%) | Framingham<br>(threshold = 20%) |
|-----------------------------|----------------------------------|----------------------------------|---------------------------------|
| <b>Odds-ratio criterion</b> |                                  |                                  |                                 |
| Australia                   | WHR, WC, BMI                     | WHR, WC, BMI                     | WHR, WC, BMI                    |
| UK and Ireland              | WHR, WC, BMI                     | WHR                              | WHR, WC, BMI                    |
| Northern Europe             | BMI, WC, WHR                     | WHR, WC, BMI                     | BMI, WHR, WC                    |
| Southern Europe             | WHR, WC                          | WHR                              | WHR, WC                         |
| Asia                        | -                                | -                                | WC, WHR, BMI <sup>#</sup>       |

Each cell represents statistically significant anthropometric measures of obesity ordered corresponding to odds-ratios, from the highest to lowest. <sup>#</sup> $p = 0.054$

Abbreviations: BMI, body mass index; WC, waist circumference; WHR, waist-to-hip ratio.

**Table 4 Area under the curve and cut-points for anthropometric measurements of general and central obesity to predict increased risk of CVD using risk score models at different thresholds for various levels of sensitivity and specificity by ethnicity**

|                                                                                         | AUC                   | Sensitivity = 70% | Sensitivity = 80% |
|-----------------------------------------------------------------------------------------|-----------------------|-------------------|-------------------|
| <b>General CVD 10-year predicted risk for CVD incidence and death (threshold = 10%)</b> |                       |                   |                   |
| Australia                                                                               |                       |                   |                   |
| BMI                                                                                     | 0.691 (0.666 , 0.716) | 24.2 (60.1%)      | 23.0 (46.1%)      |
| WC                                                                                      | 0.750 (0.727 , 0.772) | 77.3 (69.6%)      | 74.3 (57.9%)      |
| WHR                                                                                     | 0.759 (0.736 , 0.783) | 0.77 (70.1%)      | 0.75 (58.0%)      |
| UK and Ireland                                                                          |                       |                   |                   |
| BMI                                                                                     | 0.655 (0.584 , 0.726) | 23.7 (50.6%)      | 22.8 (41.2%)      |
| WC                                                                                      | 0.676 (0.611 , 0.741) | 75.3 (58.5%)      | 73.3 (51.2%)      |
| WHR                                                                                     | 0.729 (0.671 , 0.787) | 0.77 (65.6%)      | 0.75 (52.4%)      |
| Northern Europe                                                                         |                       |                   |                   |
| BMI                                                                                     | 0.770 (0.695 , 0.845) | 25.8 (71.4%)      | 24.4 (58.7%)      |
| WC                                                                                      | 0.761 (0.682 , 0.840) | 77.8 (66.7%)      | 75.3 (57.1%)      |
| WHR                                                                                     | 0.730 (0.642 , 0.817) | 0.77 (59.5%)      | 0.75 (50.8%)      |
| Southern Europe                                                                         |                       |                   |                   |
| BMI                                                                                     | 0.618 (0.536 , 0.699) | 26.5 (52.8%)      | 25.5 (44.9%)      |
| WC                                                                                      | 0.686 (0.604 , 0.768) | 81.8 (62.4%)      | 78.8 (53.4%)      |
| WHR                                                                                     | 0.702 (0.619 , 0.785) | 0.80 (61.8%)      | 0.79 (57.9%)      |
| Asia                                                                                    |                       |                   |                   |
| BMI                                                                                     | 0.564 (0.411 , 0.717) | 21.9 (38.2%)      | 21.8 (37.6%)      |
| WC                                                                                      | 0.651 (0.524 , 0.778) | 73.3 (60.0%)      | 71.8 (52.4%)      |
| WHR                                                                                     | 0.614 (0.490 , 0.739) | 0.76 (56.5%)      | 0.76 (54.7%)      |
| <b>General CVD 10-year predicted risk for CVD incidence and death (threshold = 20%)</b> |                       |                   |                   |
| Australia                                                                               |                       |                   |                   |
| BMI                                                                                     | 0.725 (0.677 , 0.772) | 25.5 (68.8%)      | 24.3 (58.1%)      |
| WC                                                                                      | 0.782 (0.743 , 0.821) | 79.8 (72.3%)      | 77.8 (66.4%)      |
| WHR                                                                                     | 0.784 (0.745 , 0.823) | 0.79 (76.3%)      | 0.77 (65.7%)      |
| UK and Ireland                                                                          |                       |                   |                   |
| BMI                                                                                     | 0.550 (0.414 , 0.685) | 23.0 (40.2%)      | 21.7 (25.4%)      |
| WC                                                                                      | 0.589 (0.472 , 0.706) | 74.8 (52.2%)      | 73.8 (48.3%)      |
| WHR                                                                                     | 0.682 (0.572 , 0.791) | 0.77 (61.3%)      | 0.75 (47.3%)      |
| Northern Europe                                                                         |                       |                   |                   |
| BMI                                                                                     | 0.818 (0.727 , 0.908) | 28.7 (82.4%)      | 26.3 (67.3%)      |
| WC                                                                                      | 0.861 (0.785 , 0.936) | 85.3 (81.1%)      | 84.3 (79.2%)      |
| WHR                                                                                     | 0.866 (0.784 , 0.947) | 0.84 (86.8%)      | 0.83 (84.9%)      |
| Southern Europe                                                                         |                       |                   |                   |
| BMI                                                                                     | 0.578 (0.437 , 0.719) | 26.8 (51.9%)      | 26.7 (50.9%)      |
| WC                                                                                      | 0.711 (0.562 , 0.859) | 84.8 (69.6%)      | 84.8 (69.6%)      |
| WHR                                                                                     | 0.725 (0.553 , 0.897) | 0.80 (62.1%)      | 0.79 (55.6%)      |
| Asia                                                                                    |                       |                   |                   |
| BMI                                                                                     | 0.555 (0.303 , 0.807) | 25.4 (73.1%)      | 21.9 (37.9%)      |
| WC                                                                                      | 0.630 (0.466 , 0.795) | 78.3 (73.6%)      | 71.8 (50.5%)      |

|                                                                                     |                       |              |              |
|-------------------------------------------------------------------------------------|-----------------------|--------------|--------------|
| WHR                                                                                 | 0.440 (0.306 , 0.573) | 0.76 (52.2%) | 0.74 (35.7%) |
| <b><i>Framingham 10-year predicted risk for CVD incidence (threshold = 20%)</i></b> |                       |              |              |
| Australia                                                                           |                       |              |              |
| BMI                                                                                 | 0.682 (0.657 , 0.707) | 24.0 (57.9%) | 22.9 (43.8%) |
| WC                                                                                  | 0.745 (0.723 , 0.768) | 76.8 (67.5%) | 73.8 (55.8%) |
| WHR                                                                                 | 0.759 (0.736 , 0.781) | 0.77 (69.7%) | 0.75 (58.1%) |
| UK and Ireland                                                                      |                       |              |              |
| BMI                                                                                 | 0.656 (0.586 , 0.726) | 23.7 (50.6%) | 22.5 (37.5%) |
| WC                                                                                  | 0.682 (0.620 , 0.745) | 75.3 (58.6%) | 73.3 (51.8%) |
| WHR                                                                                 | 0.735 (0.679 , 0.791) | 0.77 (65.8%) | 0.75 (54.2%) |
| Northern Europe                                                                     |                       |              |              |
| BMI                                                                                 | 0.783 (0.710 , 0.856) | 26.3 (75.2%) | 24.9 (65.1%) |
| WC                                                                                  | 0.770 (0.691 , 0.850) | 78.8 (71.3%) | 76.3 (60.5%) |
| WHR                                                                                 | 0.742 (0.652 , 0.832) | 0.77 (62.8%) | 0.75 (51.2%) |
| Southern Europe                                                                     |                       |              |              |
| BMI                                                                                 | 0.597 (0.514 , 0.680) | 25.8 (47.1%) | 25.1 (40.1%) |
| WC                                                                                  | 0.680 (0.601 , 0.760) | 80.8 (57.6%) | 78.3 (53.5%) |
| WHR                                                                                 | 0.711 (0.633 , 0.789) | 0.79 (61.6%) | 0.78 (51.7%) |
| Asia                                                                                |                       |              |              |
| BMI                                                                                 | 0.647 (0.524 , 0.770) | 23.5 (55.1%) | 21.9 (39.5%) |
| WC                                                                                  | 0.688 (0.586 , 0.790) | 73.3 (60.5%) | 71.8 (53.3%) |
| WHR                                                                                 | 0.645 (0.530 , 0.759) | 0.76 (56.9%) | 0.75 (44.3%) |

Abbreviations: AUC, area under the curve; BMI, body mass index; WC, waist circumference; WHR, waist-to-hip ratio.

## DISCUSSION

Our study found anthropometric measures of central obesity (WC and WHR) to be better indicators of CVD risk as they measure ectopic body fat (fat stored in the abdominal region) which is associated with decreased glucose tolerance, reduced insulin sensitivity, adverse lipid profiles and other metabolic abnormalities which are risk factors for CVD and diabetes.<sup>8</sup> Stronger associations were also reported between WC and the 10-year predicted CVD risk calculated using the general CVD and Framingham risk score models compared with BMI and WHR across most ethnic groups, while WHR recorded higher odds-ratios than WC and BMI and increased the likelihood of women being above the respective treatment thresholds of the models. WHR also presented higher area under the ROC curve, sensitivity and specificity values. Our findings are consistent with previous studies which have shown that WC and WHR, measures of central adiposity, are superior to BMI in predicting CVD and other obesity-related risk.<sup>23-26</sup> WC has already been incorporated in the diagnosis of the metabolic syndrome, a cluster of risk factors for CVD and diabetes.<sup>27</sup>

WHR should also be incorporated into CVD risk assessment. Our study provided evidence that WHR is a better diagnostic predictor of CVD than BMI and WC. It is also suitable for assessing adiposity and CVD risk in multi-ethnic cohorts as it has low measurement error, high precision, and no bias over a wide range of ethnic groups.<sup>13</sup> Equivalence tests across ethnic groups showed WHR to be independent of ethnicity.<sup>13</sup> Similar cut-off values for WHR could also be applied across ethnic groups; a value of 0.75 and 0.78 would indicate increased CVD risk for women of Australia and United Kingdom and Ireland, and Southern Europe descent, respectively. A study conducted on Latin Americans, non-Hispanic Whites and Blacks and Hispanics to estimate the accuracy and optimal cut-points for BMI, WC and WHR also found that a cut-point of 0.91 for WHR and 94 cm for WC could be used among women of different ethnicity to identify those at high coronary heart disease (CHD) risk.<sup>28</sup> WHR also reported the highest area under the ROC curve across all ethnic groups, ranging from 0.75 to 0.82.<sup>28</sup> It was also the most accurate measure to screen for high CHD risk individuals.<sup>28</sup> Another large case-control study of markers of obesity and myocardial infarction confirmed that WHR is a stronger indicator of myocardial infarction than BMI and increased the population

1  
2  
3 attributable risk of obesity by more than 3-fold in all ethnic groups.<sup>29</sup> The superiority of WHR over  
4 BMI and WC in predicting CVD risk is also demonstrated in prospective studies.<sup>23 30-33</sup>  
5  
6  
7

8  
9 The measurement of WHR, however, may pose some challenges. For example, it may be  
10 inappropriate to measure HC in certain cultures but this can be overcome with same sex observers.<sup>13</sup>  
11

12  
13 Some studies reported that WHR is imprecise while others reported that it is a precise measure.<sup>13 30 34</sup>  
14

15  
16 <sup>35</sup> The differing results could be related to the rigour of the techniques used, standardised techniques  
17 need to be adopted when measuring WHR.<sup>13</sup> A study which evaluated the precision of measuring  
18 WHR, WC and HC with comparison across ethnic groups using data from the third Risk Factor  
19 Prevalence Study found that the coefficients of variation were 0.91% for WHR, 0.78% for WC and  
20 0.57% for HC, less than 1%, indicating good precision in females.<sup>13</sup> The measurement error was 0.02  
21 for WHR, 1.66 cm for WC and 1.59 cm for HC between two successive measurements in females.<sup>13</sup>  
22

23  
24 In addition, the absolute difference between two WHR measurements for females was not  
25 significantly associated with the size of the participants.<sup>13</sup> WHR is not suitable for assessing central  
26 adiposity in the elderly<sup>36</sup> due to laxity of their abdominal muscles which would undermine the  
27 predictive value of abdominal circumferences.<sup>37</sup> In addition, WHR may remain constant during  
28 weight change and is not suitable for monitoring weight loss.<sup>38</sup> Finally, there are technical difficulties  
29 in accurately measuring the HC of severely obese individuals ( $BMI \geq 40 \text{ kg/m}^2$ ).<sup>13</sup> Measurements may  
30 be made in the supine position to overcome this problem.<sup>13</sup> In clinical settings, it may be more  
31 feasible to assess adiposity using WC while WHR could be measured in research studies as it is more  
32 informative.<sup>30</sup>  
33  
34  
35  
36  
37  
38  
39  
40  
41  
42  
43  
44  
45  
46  
47

48  
49 Although WHR was the best anthropometric obesity measure in relation to identifying individuals at  
50 increased CVD risk, this did not apply to Northern European women. BMI was a better indicator of  
51 CVD risk using the general CVD risk score model at the 10% threshold but not 20% threshold and the  
52 Framingham risk score model at the 20% threshold, with higher correlations, higher odds-ratios,  
53 higher area under the ROC curves, sensitivity and specificity values presented, compared with WHR.  
54  
55  
56  
57  
58  
59  
60

61  
62  
63  
64  
65  
66  
67  
68  
69  
70

1  
2  
3 risk in Northern European women compared to BMI. This indicates that the predictive ability of  
4 anthropometric measures of obesity vary with the treatment thresholds used for the respective risk  
5 score models and the same cut-point may not be suitable across ethnic groups.  
6  
7

8  
9  
10  
11 WC was a better predictor of CVD risk among Asian women compared to BMI and WHR. This was  
12 consistent with the results of another cross-sectional population-based survey study on Chinese people  
13 which reported that WC is the best predictor of CVD risk factors in women.<sup>39</sup> It was also the best  
14 marker of risk in a 6-year prospective study.<sup>40</sup> A small increment in WC predicted a substantial  
15 increase in CHD risk in the Chinese population.<sup>40</sup> It has been suggested that ethnicity influences  
16 specific fat depots, possibly explaining the relationship between ethnicity, adiposity and CVD risk.<sup>41</sup>  
17  
18  
19 A lower WC cut-off for Asians is necessary to avoid underestimating the population at risk.<sup>41 42</sup>  
20  
21  
22  
23  
24  
25  
26

27 Our study has limitations. It is a cross-sectional study of the Australian female population in 1989 and  
28 these results require confirmation from prospective studies. In addition, it is limited by the use of  
29 country of birth as a proxy for ethnicity.<sup>43</sup> Although country of birth is a good proxy for ethnicity in  
30 older age minority groups and is of intrinsic interest in distinguishing environmental and genetic  
31 differences, it is no longer an appropriate proxy as it does not consider the diversity of country of  
32 origin of the individual. The measurement or assignment of ethnicity is difficult and the way forward  
33 is possibly to enable people to identify themselves.<sup>44</sup> Due to a sample size of about 200 for the Asian  
34 population, different regions in Asia could not be compared. Menopausal status which is associated  
35 with increased central obesity has not been assessed in our study and has not been incorporated into  
36 these risk score models.<sup>45</sup> Further, the CVD risk was estimated using risk score models in order to  
37 stratify individuals above and below the respective treatment thresholds and not actual CVD events.  
38  
39  
40  
41  
42  
43  
44  
45  
46  
47  
48  
49  
50  
51  
52  
53  
54  
55  
56  
57  
58  
59  
60  
60 Only the Framingham and general CVD risk score models were assessed in our study. Other risk  
score models were excluded either because they could not be determined due to requirement for  
variables not assessed in our study (QRISK)<sup>46</sup> or, due to low number of participants above the  
respective recommended treatment thresholds (SCORE)<sup>47</sup>. Finally, the 10-year CVD risk for young  
adults is very rarely elevated, even in the presence of significant risk factors.<sup>48</sup>



## CONCLUSIONS

Our study confirms that ethnicity influences the association between anthropometric obesity measures and CVD risk. Central obesity measures such as WC and WHR are better indicators of CVD risk compared to BMI across ethnic groups. WHR is the best anthropometric measure for predicting CVD risk in women except Northern European and Asian women. The treatment threshold used for a risk score model affects the predictive ability of anthropometric obesity measures and the same cut-point may not be suitable across ethnic groups.

It is important to incorporate ethnicity in CVD risk assessment. Prevention and treatment efforts should be tailored to meet the needs of each ethnic group.<sup>49</sup> Ethnic-specific CVD prevention strategies need to be developed to promote healthy eating and physical activity to curtail obesity. Continued population-based prospective research is necessary to elucidate the link between obesity and CVD by ethnicity.

**Acknowledgements** Curtin University provided educational support to LGHG through the Curtin International Postgraduate Research Scholarship.

**Contributors** LGHG was involved in drafting the manuscript, performing the analysis, interpretation of data and revising the manuscript critically for important intellectual content. SSD conceived the study, performed the analysis and data interpretation and revised the manuscript critically for important intellectual content. TAW participated in the study design, acquired the data and revised the manuscript critically for important intellectual content. All authors read and approved the final manuscript.

**Competing interests** None.

**Funding** None.

1  
2  
3 **Ethics approval** We have ethics approval for the use of the National Heart Foundation data from the  
4  
5 Australian Institute of Health Interim Ethics Committee, after consultation with the Commonwealth  
6  
7 Privacy Commissioner, and approval from the Human Research Ethics Committee at Curtin  
8  
9 University. This study was carried out in accordance with the Declaration of Helsinki.  
10

11  
12  
13 **Data sharing statement** No additional data are available.  
14  
15  
16  
17  
18  
19  
20  
21  
22  
23  
24  
25  
26  
27  
28  
29  
30  
31  
32  
33  
34  
35  
36  
37  
38  
39  
40  
41  
42  
43  
44  
45  
46  
47  
48  
49  
50  
51  
52  
53  
54  
55  
56  
57  
58  
59  
60

## REFERENCES

1. Australian Bureau of Statistics. 4364.0.55.001 - Australian Health Survey: First Results, 2011-12  
Secondary 4364.0.55.001 - Australian Health Survey: First Results, 2011-12 2012.  
<http://www.abs.gov.au/AUSSTATS/abs@.nsf/DetailsPage/4364.0.55.0012011-12?OpenDocument>.
2. Sassi F, Devaux M, Cecchini M, et al. The Obesity Epidemic: Analysis of Past and Projected Future Trends in Selected OECD Countries, OECD Health Working Papers, No. 45, OECD Publishing, 2009.
3. National Health and Medical Research Council. Clinical practice guidelines for the management of overweight and obesity in adults, adolescents and children in Australia. Melbourne: National Health and Medical Research Council, 2013.
4. Australian Bureau of Statistics. 4719.0 - Overweight and obesity in adults 2004-05. Canberra: ABS, 2008.
5. O'Dea JA. Gender, ethnicity, culture and social class influences on childhood obesity among Australian schoolchildren: implications for treatment, prevention and community education. *Health Soc Care Community* 2008;**16**(3):282-90.
6. Lear SA, Toma M, Birmingham CL, et al. Modification of the relationship between simple anthropometric indices and risk factors by ethnic background. *Metabolism* 2003;**52**(10):1295-301.
7. Zhang X, Shu XO, Gao Y-T, et al. Anthropometric predictors of coronary heart disease in Chinese women. *Int J Obes* 2004;**28**:734-40.
8. Huxley R, Mendis S, Zheleznyakov E, et al. Body mass index, waist circumference and waist:hip ratio as predictors of cardiovascular risk—a review of the literature. *Eur J Clin Nutr* 2010;**64**:16-22.
9. Razak F, Anand S, Vuksan V, et al. Ethnic differences in the relationships between obesity and glucose-metabolic abnormalities: a cross-sectional population-based study. *Int J Obes* 2005;**29**:656-67.

- 1  
2  
3 10. Lee CMY, Huxley RR, Wildman RP, et al. Indices of abdominal obesity are better discriminators  
4  
5 of cardiovascular risk factors than BMI: a meta-analysis. *J Clin Epidemiol* 2008;**61**(7):646-  
6  
7 53.
- 8  
9 11. Obesity in Asia Collaboration. Ethnic comparisons of obesity in the Asia-Pacific region: protocol  
10  
11 for a collaborative overview of cross-sectional studies. *Obes Rev* 2005;**6**(3):193-98.
- 12  
13 12. Australian Risk Factor Prevalence Study Management Committee. Survey No. 3 1989. Canberra:  
14  
15 National Heart Foundation of Australia and Australia Institute of Health, 1990.
- 16  
17 13. Dhaliwal SS, Welborn TA. Measurement error and ethnic comparisons of measures of abdominal  
18  
19 obesity. *Prev Med* 2009;**49**(2-3):148-52.
- 20  
21 14. Boyle CA, Dobson AJ, Egger G, et al. Waist-to-hip ratios in Australia: A different picture of  
22  
23 obesity. *Aust J Nutr Diet* 1993;**50**:57-64.
- 24  
25 15. Alexander H, Dugdale A. Which waist-hip ratio? *Med J Aust* 1990;**153**(6):367-68.
- 26  
27 16. Anderson KM, Odell PM, Wilson PW, et al. Cardiovascular disease risk profiles. *Am Heart J*  
28  
29 1991;**121**(1 Part 2):293-98.
- 30  
31 17. Goh LGH, Dhaliwal SS, Lee AH, et al. Utility of established cardiovascular disease risk score  
32  
33 models for the 10-year prediction of disease outcomes in women. *Expert Rev Cardiovasc*  
34  
35 *Ther* 2013;**11**(4):425-35.
- 36  
37 18. D'Agostino RB, Vasan RS, Pencina MJ, et al. General cardiovascular risk profile for use in  
38  
39 primary care - The Framingham Heart Study. *Circulation* 2008;**117**(6):743-53.
- 40  
41 19. Mosca L, Benjamin EJ, Berra K, et al. Effectiveness-Based Guidelines for the Prevention of  
42  
43 Cardiovascular Disease in Women—2011 Update A Guideline From the American Heart  
44  
45 Association. *J Am Coll Cardiol* 2011;**57**(12):1404-23.
- 46  
47 20. Genest J, McPherson R, Frohlich J, et al. 2009 Canadian Cardiovascular Society/Canadian  
48  
49 guidelines for the diagnosis and treatment of dyslipidemia and prevention of cardiovascular  
50  
51 disease in the adult – 2009 recommendations. *Can J Cardiol* 2009;**25**(10):567-79.
- 52  
53 21. Neil HAW, Perera R, Armitage JM, et al. Estimated 10-year cardiovascular risk in a British  
54  
55 population: results of a national screening project. *Int J Clin Pract* 2008;**62**(9):1322-31.
- 56  
57  
58  
59  
60

- 1  
2  
3 22. Woodward M, Brindle P, Tunstall-Pedoe H. Adding social deprivation and family history to  
4 cardiovascular risk assessment: the ASSIGN score from the Scottish Heart Health Extended  
5 Cohort (SHHEC). *Heart* 2007;**93**(2):172-76.  
6  
7  
8  
9 23. Welborn TA, Dhaliwal SS. Preferred clinical measures of central obesity for predicting mortality.  
10 *Eur J Clin Nutr* 2007;**61**(12):1373-79.  
11  
12  
13 24. Wei M, Gaskill SP, Haffner SM, et al. Waist circumference as the best predictor of noninsulin  
14 dependent diabetes mellitus (NIDDM) compared to body mass index, waist/hip ratio and  
15 other anthropometric measurements in Mexican Americans--a 7-year prospective study. *Obes*  
16 *Res* 1997;**5**(1):16-23.  
17  
18  
19 25. Janssen I, Katzmarzyk PT, Ross R. Waist circumference and not body mass index explains  
20 obesity-related health risk. *Am J Clin Nutr* 2004;**79**(3):379-84.  
21  
22  
23 26. Biggaard J, Frederiksen K, Tjønneland A, et al. Waist circumference and body composition in  
24 relation to all-cause mortality in middle-aged men and women. *Int J Obes* 2005;**29**:778-84.  
25  
26  
27 27. Roger VL, Go AS, Lloyd-Jones DM, et al. Heart Disease and Stroke Statistics—2011 Update / 1.  
28 About 1. About These Statistics / 2. American Heart Association's 2020 Impact Goals / 3.  
29 Cardiovascular Diseases / 4. Subclinical Atherosclerosis / 5. Coronary Heart Disease, Acute  
30 Coronary Syndrome, and Angina Pectoris / 6. Stroke (Cerebrovascular Disease) / 7. High  
31 Blood Pressure / 8. Congenital Cardiovascular Defects / 9. Cardiomyopathy and Heart Failure  
32 / 10. Other Cardiovascular Diseases / 11. Family History and Genetics / 12. Risk Factor:  
33 Smoking/Tobacco Use / 13. Risk Factor: High Blood Cholesterol and Other Lipids / 14. Risk  
34 Factor: Physical Inactivity / 15. Risk Factor: Overweight and Obesity / 16. Risk Factor:  
35 Diabetes Mellitus / 17. End-Stage Renal Disease and Chronic Kidney Disease / 18. Metabolic  
36 Syndrome / 19. Nutrition / 20. Quality of Care / 21. Medical Procedures / 22. Economic Cost  
37 of Cardiovascular Disease / 23. At-a-Glance Summary Tables / 24. Glossary. *Circulation*  
38 2011;**123**(4):e18-e209.  
39  
40  
41  
42  
43  
44  
45  
46  
47  
48 28. Herrera VM, Casas JP, Miranda JJ, et al. Interethnic differences in the accuracy of anthropometric  
49 indicators of obesity in screening for high risk of coronary heart disease. *Int J Obes*  
50 2009;**33**:568-76.  
51  
52  
53  
54  
55  
56  
57  
58  
59  
60

- 1  
2  
3 29. Yusuf S, Hawken S, Ôunpuu S, et al. Obesity and the risk of myocardial infarction in 27□000  
4 participants from 52 countries: a case-control study. *Lancet* 2005;**366**(9497):1640-49.  
5  
6  
7 30. de Koning L, Merchant AT, Pogue J, et al. Waist circumference and waist-to-hip ratio as  
8 predictors of cardiovascular events: meta-regression analysis of prospective studies. *Eur Heart*  
9 *J* 2007;**28**(7):850-56.  
10  
11  
12 31. See R, Abdullah SM, McGuire DK, et al. The Association of Differing Measures of Overweight  
13 and Obesity With Prevalent Atherosclerosis: The Dallas Heart Study. *J Am Coll Cardiol*  
14 2007;**50**(8):752-59.  
15  
16  
17 32. Welborn TA, Dhaliwal SS, Bennett SA. Waist-hip ratio is the dominant risk factor predicting  
18 cardiovascular death in Australia. *Med J Aust* 2003;**179**(11-12):580-85.  
19  
20  
21 33. Dhaliwal SS, Welborn TA. Central obesity and multivariable cardiovascular risk as assessed by  
22 the Framingham prediction scores. *Am J Cardiol* 2009;**103**:1403-07.  
23  
24  
25 34. Ulijaszek SJ, Kerr DA. Anthropometric measurement error and the assessment of nutritional  
26 status. *Br J Nutr* 1999;**82**(3):165-77.  
27  
28  
29 35. Sebo P, Beer-Borst S, Haller DM, et al. Reliability of doctors' anthropometric measurements to  
30 detect obesity. *Prev Med* 2008;**47**(4):389-93.  
31  
32  
33 36. Goodman-Gruen D, Barrett-Connor E. Sex Differences in Measures of Body Fat and Body Fat  
34 Distribution in the Elderly. *Am J Epidemiol* 1996;**143**(9):898-906.  
35  
36  
37 37. Turcato E, Bosello O, Di Francesco V, et al. Waist circumference and abdominal sagittal diameter  
38 as surrogates of body fat distribution in the elderly: their relation with cardiovascular risk  
39 factors. *Int J Obes Relat Metab Disord* 2000;**24**(8):1005-10.  
40  
41  
42 38. Caan B, Armstrong MA, Selby JV, et al. Changes in measurements of body fat distribution  
43 accompanying weight change. *Int J Obes Relat Metab Disord* 1994;**18**(6):397-404.  
44  
45  
46 39. Ho SC, Chen YM, Woo JLF, et al. Association between simple anthropometric indices and  
47 cardiovascular risk factors. *Int J Obes Relat Metab Disord* 2001;**25**(11):1689-97.  
48  
49  
50 40. Li G, Chen X, Jang Y, et al. Obesity, coronary heart disease risk factors and diabetes in Chinese:  
51 an approach to the criteria of obesity in the Chinese population. *Obes Rev* 2002;**3**(3):167-72.  
52  
53  
54  
55  
56  
57  
58  
59  
60

- 1  
2  
3 41. Kohli S, Sniderman AD, Tchernof A, et al. Ethnic-specific differences in abdominal subcutaneous  
4 adipose tissue compartments. *Obesity* 2010;**18**(11):2177-83.  
5  
6  
7 42. Tan C-E, Ma S, Wai D, et al. Can We Apply the National Cholesterol Education Program Adult  
8 Treatment Panel Definition of the Metabolic Syndrome to Asians? *Diabetes Care*  
9 2004;**27**(5):1182-86.  
10  
11  
12 43. Gill PS, Bhopal R, Wild S, et al. Limitations and potential of country of birth as proxy for ethnic  
13 group. *BMJ* 2005;**330**(7484):196.  
14  
15  
16  
17 44. Bhopal R. Glossary of terms relating to ethnicity and race: for reflection and debate. *J Epidemiol*  
18 *Community Health* 2004;**58**(6):441-45.  
19  
20  
21 45. Carr MC. The Emergence of the Metabolic Syndrome with Menopause. *J Clin Endocrinol Metab*  
22 2003;**88**(6):2404-11.  
23  
24  
25 46. Hippisley-Cox J, Coupland C, Vinogradova Y, et al. Predicting cardiovascular risk in England and  
26 Wales: prospective derivation and validation of QRISK2. *BMJ* 2008;**336**(7659):1475-82.  
27  
28  
29 47. Conroy RM, Pyörälä K, Fitzgerald AP, et al. Estimation of ten-year risk of fatal cardiovascular  
30 disease in Europe: The SCORE project. *Eur Heart J* 2003;**24**(11):987-1003.  
31  
32  
33 48. Greenland P, Alpert JS, Beller GA, et al. 2010 ACCF/AHA Guideline for Assessment of  
34 Cardiovascular Risk in Asymptomatic Adults. *Circulation* 2010;**122**(25):e584-e636.  
35  
36  
37 49. Wang Y, Beydoun MA. The Obesity Epidemic in the United States—Gender, Age,  
38 Socioeconomic, Racial/Ethnic, and Geographic Characteristics: A Systematic Review and  
39 Meta-Regression Analysis. *Epidemiol Rev* 2007;**29**(1):6-28.  
40  
41  
42  
43  
44  
45  
46  
47  
48  
49  
50  
51  
52  
53  
54  
55  
56  
57  
58  
59  
60

1  
2  
3 **Ethnicity and the association between anthropometric indices of**  
4  
5  
6 **obesity and cardiovascular risk in women: a cross-sectional study**  
7  
8  
9

10  
11 Correspondence to: Professor Satvinder S Dhaliwal

12  
13 School of Public Health, Curtin Health Innovation Research Institute, Curtin University, GPO Box  
14  
15 U1987, Perth, WA 6845, Australia

16  
17 Tel: +618 9266 2949

18  
19 Fax: +618 9266 2958

20  
21 E-mail: [s.dhaliwal@curtin.edu.au](mailto:s.dhaliwal@curtin.edu.au)  
22  
23

24  
25 Louise GH Goh,<sup>1</sup> Satvinder S Dhaliwal,<sup>1</sup> Timothy A Welborn,<sup>2</sup> Andy H Lee,<sup>1</sup> Phillip R Della<sup>3</sup>  
26  
27

28  
29 <sup>1</sup>School of Public Health, Curtin Health Innovation Research Institute, Curtin University, GPO Box  
30  
31 U1987, Perth, WA 6845, Australia  
32

33 <sup>2</sup>Sir Charles Gairdner Hospital, Hospital Avenue, Nedlands, Perth, WA 6009, Australia  
34

35 <sup>3</sup>School of Nursing and Midwifery, Curtin Health Innovation Research Institute, Curtin University,  
36  
37 GPO Box U1987, Perth, WA 6845, Australia  
38  
39

40  
41 Ethnicity, obesity and cardiovascular risk  
42  
43  
44

45  
46 Keywords: Obesity, epidemiology, cardiovascular diseases, prevention and women  
47  
48  
49  
50  
51  
52  
53  
54  
55  
56  
57  
58  
59  
60



**ABSTRACT**

**Objectives:** The objectives of this study were to determine whether the cross-sectional associations between anthropometric obesity measures, body mass index (BMI), waist circumference (WC) and waist-to-hip ratio (WHR), and calculated 10-year cardiovascular disease (CVD) risk using the Framingham and general CVD risk score models, is the same for women of Australian, United Kingdom and Ireland, North European, South European and Asian descent. This study would investigate which anthropometric obesity measure is most predictive at identifying women at increased CVD risk in each ethnic group.

**Design:** Cross-sectional data from the National Heart Foundation Risk Factor Prevalence Study.

**Setting:** Population-based survey in Australia.

**Participants:** 4354 women aged 20-69 years with no previous history of heart disease, diabetes or stroke. Most participants were of Australian, United Kingdom and Ireland, North European, South European or Asian descent (97%).

**Outcome measures:** Anthropometric obesity measures that demonstrated stronger predictive ability of identifying women at increased CVD risk and likelihood of being above the promulgated treatment thresholds of various risk score models.

**Results:** Central obesity measures, WC, WHR, were better predictors of cardiovascular risk. WHR reported stronger predictive ability than WC and BMI in Caucasian women. In Northern European women, BMI was a better indicator of risk using the general CVD (10% threshold) and Framingham (20% threshold) risk score models. WC was the most predictive of cardiovascular risk among Asian women.

1  
2  
3  
4  
5  
6  
7  
8  
9  
10  
11  
12  
13  
14  
15  
16  
17  
18  
19  
20  
21  
22  
23  
24  
25  
26  
27  
28  
29  
30  
31  
32  
33  
34  
35  
36  
37  
38  
39  
40  
41  
42  
43  
44  
45  
46  
47  
48  
49  
50  
51  
52  
53  
54  
55  
56  
57  
58  
59  
60

**Conclusions:** Ethnicity should be incorporated into CVD assessment. The same anthropometric obesity measure cannot be used across all ethnic groups. Ethnic-specific CVD prevention and treatment strategies need to be further developed.

For peer review only

## ARTICLE SUMMARY

### Strengths and limitations of this study

- This study confirms that ethnicity influences the association between anthropometric obesity measures and CVD risk.
- Central obesity measures such as WC and WHR are better indicators of CVD risk compared to BMI across ethnic groups.
- The treatment threshold used for a risk score model affects the predictive ability of anthropometric obesity measures and the same cut-point may not be suitable across ethnic groups.
- It is a cross-sectional study of the Australian female population in 1989 and these results require confirmation from prospective studies.
- Due to a sample size of about 200 for the Asian population, different regions in Asia could not be compared.
- The CVD risk was estimated using risk score models in order to stratify individuals above and below the respective treatment thresholds and not actual CVD events.

## INTRODUCTION

In Australia, approximately 63% of adults were overweight and obese in 2011-2012.<sup>1</sup> The proportion of the Australian population who are overweight and obese is expected to increase to approximately 66% in the next five years.<sup>2</sup> The National Health and Medical Research Council have developed Clinical Practice Guidelines for the Management of Overweight and Obesity for Adults, Adolescents and Children in Australia to provide guidance on assessing and managing obesity.<sup>3</sup>

Overweight and obesity affects all socioeconomic groups in Australia, but it is more prevalent in some ethnic groups.<sup>4,5</sup> Variations exist in the associations between excess weight and obesity-related conditions among different racial and ethnic groups. Ethnicity significantly affects the associations between anthropometric indices used to assess adiposity such as body mass index (BMI) and waist circumference (WC), and cardiovascular disease (CVD) risk factors.<sup>6</sup>

Previous epidemiological studies which assessed the associations between anthropometric indices of obesity and CVD were mostly conducted in Western societies.<sup>7</sup> It is thus not clear which anthropometric obesity measures are more strongly associated with CVD risk in different ethnic groups.<sup>8</sup> To address this, it is necessary to examine the relationship between anthropometric obesity measures and CVD risk by ethnicity and this has been proposed in previous studies as well.<sup>9-11</sup> These fundamental issues need to be addressed in order to recommend effective weight management and disease prevention strategies to reduce the burden associated with overweight and obesity in all population groups.

The objectives of this study were to determine whether the cross-sectional associations between anthropometric obesity measures (BMI, WC and waist-to-hip ratio) and calculated 10-year CVD risk using the Framingham and general CVD risk score models, is the same for women of Australian, United Kingdom and Ireland, North European, South European and Asian descent. This study would investigate which anthropometric obesity measure is most predictive at identifying women at increased CVD risk in each ethnic group.

## METHODS

### Study participants

Participants were selected from the third Risk Factor Prevalence Study<sup>12</sup> conducted by the National Heart Foundation (NHF) of Australia in 1989. Residents on the federal electoral rolls of December 1988 in North and South Sydney, Melbourne, Brisbane, Adelaide, Perth, Hobart, Darwin and Canberra were recruited for the Risk Factor Prevalence Study by systemic probability sampling of sex and 5-year age groups. [Complete data were available on 4727 women.](#) Country of birth was used as a surrogate for ethnicity and grouped into regions.<sup>12</sup> Most participants were of Australian, United Kingdom and Ireland, North European, South European or Asian descent (97%). We selected a representative sample of 4354 women aged 20-69 years with no previous history of heart disease, diabetes or stroke for analysis. [There were 3329 Australian women, 416 women from the United Kingdom and Ireland, 180 Northern European women, 234 Southern European women and 195 Asian women. Further details have been described in the third Risk Factor Prevalence Study and in a previous study.](#)<sup>12 13</sup>

### Ethics statement

Ethical approval for the NHF data was obtained in advance from the Australian Institute of Health Interim Ethics Committee, after consultation with the Commonwealth Privacy Commissioner. Participation was entirely voluntary. Those who participated signed an informed consent form.<sup>12</sup> Participant information was anonymized prior to analysis. This study was approved by the Human Research Ethics Committee at Curtin University, and complies with the Declaration of Helsinki.

### Anthropometry

A single record of height (to the nearest centimetre) and weight (to the nearest 10<sup>th</sup> of a kilogram) was taken in light summer clothes without shoes. BMI was calculated based on weight in kilograms divided by square of height in meters. Waist and hip circumferences were measured according to standardized methodologies [by trained anthropometrists.](#)<sup>14 15</sup> The WC was measured from the front at the narrowest point between the rib cage and iliac crest after full expiration while the hip

1  
2  
3 circumference (HC) was measured from the side at the maximal extension of buttocks by one  
4 observer using a metal tape. A second observer recorded another set of measurements and ensured  
5 that the metal tape was kept strictly horizontal at all times. The mean of two measurements was taken  
6 at each site to the nearest centimetre. The waist-to-hip ratio (WHR) was calculated based on WC  
7 divided by the HC. Information on demographic characteristics, medical conditions and smoking  
8 behaviour were collected. Mercury sphygmomanometers were used to record blood pressure levels on  
9 the right arm of seated participants five minutes apart.<sup>12</sup> Two readings were taken and the average was  
10 used in the analysis. Fasting blood samples were collected in EDTA tubes and despatched to the  
11 central laboratory at the Division of Clinical Chemistry, Institute of Medical and Veterinary Science,  
12 Adelaide each week for cholesterol levels to be assayed.

### 23 24 25 **Risk score models**

26  
27 The Framingham risk score model<sup>16</sup> predicts the 10-year CVD incidence. It was developed from the  
28 American Framingham Heart Study using participants aged 30-74 years who were free of CVD and  
29 cancer. Risk variables used to calculate the 10-year risk include, age, sex, systolic blood pressure  
30 (SBP), diastolic blood pressure, total cholesterol level, high-density lipoprotein (HDL) cholesterol  
31 level, smoking status, diabetes status and electrocardiogram-left ventricular hypertrophy (ECG-  
32 LVH).<sup>16</sup> The most commonly used treatment threshold for the Framingham model was 20%,<sup>17</sup> this  
33 denotes that an individual who has a risk score of more than 20% is considered to be at increased risk  
34 of experiencing a CVD event within the next 10 years and should be targeted for treatment.

35  
36 Although the general CVD risk score model for predicting the 10-year CVD incidence and death was  
37 also developed based on data from the American Framingham Heart Study, it was developed from a  
38 larger cohort and consisted of participants without CVD only.<sup>18</sup> The general CVD risk score model  
39 contains these variables, age, total cholesterol level, HDL cholesterol level, SBP, current  
40 antihypertensive treatment, smoking status and diabetes status.<sup>18</sup> Treatment thresholds of 10% and  
41 20% were reported for this model.<sup>18 19</sup>

### Statistical analysis

Demographic and clinical characteristics of the sample were described using mean  $\pm$  standard deviation for continuous variables, while counts (percentages) were used for categorical variables. Comparisons between means of continuous variables were conducted using Analysis of Variance, with age as a covariate, and with Bonferroni adjustment for multiple comparisons. Means with different superscripts were significantly different at the 5% level of significance. Non-parametric Spearman's rank correlation was used to assess the associations between BMI, WC and WHR and the 10-year predicted CVD risk calculated using Framingham and general CVD risk score models by ethnicity, due to the skewness in the distribution of risk variables. These measures were also converted to z-scores (original value subtracted by the mean and the result divided by the standard deviation) to represent the number of standard deviations above and below the mean of each anthropometric obesity measure for each individual. Logistic regression was used to assess the effects of each standardised obesity measure of being above the recommended treatment threshold for the respective risk score models (10% and 20%), as a result of a one standard deviation increment above the mean of each measure of obesity, by ethnicity. These effects were represented using odds-ratios and associated 95% confidence intervals. The predictive ability of these anthropometric obesity measures to identify individuals from different ethnic groups above the treatment threshold of 20% for the Framingham model for 10-year CVD incidence, and 10% and 20% for the general CVD risk score model for 10-year CVD incidence and death was assessed using the area under the receiver operating characteristic (ROC) curve. Ethnic-specific cut-off values of the anthropometric obesity measures and associated level of specificity to predict increased risk of CVD at 70% and 80% sensitivity were also presented. P-values of less than 0.05 were considered to be statistically significant. All statistical analyses were performed with IBM SPSS Statistics Version 21.

### RESULTS

The demographic and clinical characteristics of the multi-ethnic sample of 4354 women without heart disease, diabetes or stroke are presented in Table 1. Southern European women generally had higher

1  
2  
3 BMI, WC and WHR compared to other ethnic groups, and Asian women had lower anthropometric  
4  
5 obesity measures.  
6  
7

8  
9 All Spearman's rank correlations were statistically significant ( $p < 0.0005$ ). Overall, WC ~~was most~~  
10 appeared to have a stronger association ~~strongly associated~~ with the 10-year predicted risk calculated  
11  
12 using the general CVD and Framingham risk score models across all ethnic groups except in  
13  
14 European women (Table 2). BMI ~~was appeared to be more~~ ~~strongly correlated~~ associated with CVD  
15  
16 risk calculated using both models in Northern European women while WHR was ~~more strongly~~  
17 ~~correlated~~ more associated with the predicted risk in Southern European women.  
18  
19  
20  
21

22  
23 The recommended treatment thresholds for the general CVD risk score model at 10% and 20%, and  
24  
25 the Framingham risk score model at 20% were identified from a review of the literature. Table 3a  
26  
27 presents the effects of a one standard deviation increment in BMI, WC and WHR above the mean on  
28  
29 the likelihood of being above the recommended threshold in each ethnic group. Increase in  
30  
31 anthropometric measurements was generally associated with an increased likelihood of being above  
32  
33 the treatment thresholds for all models. A one standard deviation change in all obesity measures in  
34  
35 Asian women did not have a significant effect on the CVD risk as calculated using the general CVD  
36  
37 model both at the 10% and 20% threshold. BMI was not effective in predicting the likelihood of being  
38  
39 above the treatment threshold across all models for Southern European women.  
40  
41  
42

43  
44 Table 3b summarises the results in Table 3a by presenting only statistically significant anthropometric  
45  
46 obesity measures which increase the likelihood of individuals being above the treatment threshold,  
47  
48 with measures of obesity ordered corresponding to odds-ratios, from the highest to lowest. WHR  
49  
50 generally recorded higher odds-ratios than WC and BMI and increased the likelihood of individuals of  
51  
52 different ethnicity being above the respective treatment thresholds of the respective models. Only  
53  
54 BMI presented higher odds-ratios and increased the likelihood of Northern European women being  
55  
56 indicated for treatment based on the predicted risk calculated from the general CVD model at the 10%  
57  
58  
59  
60



1  
2  
3 threshold but not 20% threshold and Framingham model at the 20% threshold. WC recorded higher  
4  
5 odds-ratios in Asian women using the Framingham model at the 20% threshold.  
6  
7

8  
9 Higher area under the ROC curve, sensitivity and specificity were recorded with WHR in predicting  
10  
11 the 10-year CVD risk calculated using the general CVD and Framingham risk score models across  
12  
13 most ethnic groups (Table 4). The highest area under the ROC curve and specificity value at 80%  
14  
15 sensitivity for WHR was 0.866 and 84.9% for Northern European women with the general CVD  
16  
17 model at the 20% threshold.  
18  
19

20  
21 In Northern European women, BMI was a better predictor of CVD risk calculated using the general  
22  
23 CVD risk score model at the 10% threshold but not 20% threshold and the Framingham risk score  
24  
25 model at the 20% threshold, compared with WC and WHR. WHR, however, was the better indicator  
26  
27 of CVD risk using the general CVD risk score model with a 20% threshold, in Northern European  
28  
29 women. In Asian women, WC reported consistently higher area under the ROC curve, sensitivity and  
30  
31 specificity across all CVD models and thresholds. The area under the ROC curve values ranged from  
32  
33 0.630 to 0.688 and specificity values ranged from 50.5% to 53.3% at 80% sensitivity in Asian women.  
34  
35 The cut-off values for BMI, WC and WHR are also presented in Table 4. A WHR value of 0.75  
36  
37 would indicate increased CVD risk for women from Australia and United Kingdom and Ireland while  
38  
39 a value of 0.78 would indicate increased risk for Southern European women. In Asian women, a WC  
40  
41 of 71.8 cm would indicate increased CVD risk. A BMI of 24.4 kg/m<sup>2</sup> would indicate increased risk in  
42  
43 Northern European women. The diagnostic abilities of the various anthropometric obesity measures to  
44  
45 identify women as being above the threshold and hence identified for treatment varies according to  
46  
47 ethnic groups.  
48  
49  
50  
51  
52  
53  
54  
55  
56  
57  
58  
59  
60

**Table 1 Characteristics of the sample of 4354 women without heart disease, diabetes or stroke by ethnicity**

|                               | Statistics | Australia                | UK and Ireland            | Northern Europe            | Southern Europe          | Asia                       |
|-------------------------------|------------|--------------------------|---------------------------|----------------------------|--------------------------|----------------------------|
| <b>Count</b>                  | N          | 3329                     | 416                       | 180                        | 234                      | 195                        |
| <b>Age (years)</b>            | Mean ± SD  | 41.9 ± 13.5              | 45.7 ± 12.5               | 49.0 ± 11.7                | 47.8 ± 10.6              | 40.5 ± 10.9                |
| <b>Current smoker (Yes)</b>   | n (%)      | 751 (22.6%)              | 91 (21.9%)                | 39 (21.7%)                 | 32 (13.7%)               | 19 (9.7%)                  |
| <b>Weight (kg)</b>            | Mean ± SD  | 65.4 ± 12.6 <sup>a</sup> | 65.2 ± 12.0 <sup>a</sup>  | 66.5 ± 12.6 <sup>a</sup>   | 66.9 ± 11.8 <sup>a</sup> | 58.6 ± 11.6 <sup>b</sup>   |
| <b>Height (cm)</b>            | Mean ± SD  | 162.8 ± 6.0 <sup>a</sup> | 162.3 ± 6.2 <sup>a</sup>  | 161.9 ± 6.2 <sup>a</sup>   | 156.8 ± 6.1 <sup>b</sup> | 156.7 ± 5.7 <sup>b</sup>   |
| <b>BMI (kg/m<sup>2</sup>)</b> | Mean ± SD  | 24.7 ± 4.8 <sup>b</sup>  | 24.7 ± 4.2 <sup>b,c</sup> | 25.4 ± 4.6 <sup>b,d</sup>  | 27.2 ± 4.4 <sup>a</sup>  | 23.8 ± 4.3 <sup>c,d</sup>  |
| <b>WC (cm)</b>                | Mean ± SD  | 75.9 ± 11.0 <sup>b</sup> | 76.2 ± 10.5 <sup>b</sup>  | 78.4 ± 11.9 <sup>b</sup>   | 81.2 ± 11.0 <sup>a</sup> | 73.9 ± 10.4 <sup>b</sup>   |
| <b>WHR</b>                    | Mean ± SD  | 0.76 ± 0.06 <sup>c</sup> | 0.76 ± 0.06 <sup>c</sup>  | 0.77 ± 0.07 <sup>b,c</sup> | 0.79 ± 0.06 <sup>a</sup> | 0.77 ± 0.06 <sup>a,b</sup> |
| <b>SBP (mmHg)</b>             | Mean ± SD  | 122 ± 18 <sup>a</sup>    | 123 ± 18 <sup>b,c</sup>   | 126 ± 19 <sup>a,b,c</sup>  | 127 ± 19 <sup>a,b</sup>  | 116 ± 19 <sup>c</sup>      |
| <b>HDL (mmol/L)</b>           | Mean ± SD  | 1.5 ± 0.4 <sup>a</sup>   | 1.5 ± 0.4 <sup>a</sup>    | 1.5 ± 0.4 <sup>a</sup>     | 1.4 ± 0.3 <sup>b</sup>   | 1.4 ± 0.4 <sup>a,b</sup>   |
| <b>TC (mmol/L)</b>            | Mean ± SD  | 5.4 ± 1.1                | 5.6 ± 1.2                 | 5.7 ± 1.3                  | 5.7 ± 1.1                | 5.2 ± 1.0                  |
| <b>Ratio: HDL to TC</b>       | Mean ± SD  | 3.9 ± 1.3 <sup>b</sup>   | 4.0 ± 1.4 <sup>a,b</sup>  | 4.0 ± 1.4 <sup>b</sup>     | 4.3 ± 1.4 <sup>a</sup>   | 3.9 ± 1.2 <sup>a,b</sup>   |

<sup>a,b,c,d</sup> Means with different superscripts were significantly different at the 5% level of significance, after adjusting for age.

Abbreviations: BMI, body mass index; WC, waist circumference; WHR, waist-to-hip ratio; SBP, systolic blood pressure; HDL, high-density lipoprotein cholesterol; TC, total cholesterol.

**Table 2 Non-parametric correlations between anthropometric measurements of general and central obesity and 10-year predicted risk of CVD incidence and mortality by ethnicity in 4354 women**

| Ethnicity                                                             | BMI   | WC    | WHR   |
|-----------------------------------------------------------------------|-------|-------|-------|
| <i>General CVD 10-year predicted risk for CVD incidence and death</i> |       |       |       |
| Australia                                                             | 0.372 | 0.443 | 0.402 |
| UK and Ireland                                                        | 0.360 | 0.406 | 0.365 |
| Northern Europe                                                       | 0.504 | 0.462 | 0.435 |
| Southern Europe                                                       | 0.356 | 0.479 | 0.485 |
| Asia                                                                  | 0.306 | 0.396 | 0.308 |
| Overall                                                               | 0.384 | 0.451 | 0.408 |
| <i>Framingham 10-year predicted risk for CVD incidence</i>            |       |       |       |
| Australia                                                             | 0.366 | 0.440 | 0.405 |
| UK and Ireland                                                        | 0.349 | 0.399 | 0.361 |
| Northern Europe                                                       | 0.500 | 0.464 | 0.445 |
| Southern Europe                                                       | 0.358 | 0.483 | 0.491 |
| Asia                                                                  | 0.311 | 0.402 | 0.308 |
| Overall                                                               | 0.380 | 0.449 | 0.412 |

All Spearman's rank correlations significant at the  $p < 0.0005$  level

Abbreviations: BMI, body mass index; WC, waist circumference; WHR, waist-to-hip ratio.

**Table 3a Odds-ratios and associated 95% confidence intervals of being above the recommended treatment threshold for various risk score models as a result of a 1 standard deviation increment above the mean for each anthropometric measure of obesity by ethnicity**

| Ethnicity                                                                                               | BMI                             | WC                    | WHR                   |
|---------------------------------------------------------------------------------------------------------|---------------------------------|-----------------------|-----------------------|
| <i>General CVD 10-year predicted risk for CVD incidence and death (threshold = 10%)<sup>19</sup></i>    |                                 |                       |                       |
| Australia                                                                                               | 1.69*** (1.55 - 1.85)           | 2.16*** (1.96 - 2.38) | 2.36*** (2.13 - 2.62) |
| UK and Ireland                                                                                          | 1.71*** (1.29 - 2.25)           | 1.86*** (1.42 - 2.43) | 2.09*** (1.58 - 2.75) |
| Northern Europe                                                                                         | 2.50*** (1.67 - 3.74)           | 2.28*** (1.61 - 3.24) | 2.23*** (1.55 - 3.21) |
| Southern Europe                                                                                         | 1.37 (0.97 - 1.94)              | 1.64** (1.18 - 2.28)  | 1.89** (1.32 - 2.70)  |
| Asia                                                                                                    | 1.14 (0.62 - 2.09)              | 1.57 (0.97 - 2.56)    | 1.48 (0.88 - 2.47)    |
| <i>General CVD 10-year predicted risk for CVD incidence and death (threshold = 20%)<sup>18 20</sup></i> |                                 |                       |                       |
| Australia                                                                                               | 1.65*** (1.43 - 1.91)           | 2.07*** (1.78 - 2.41) | 2.11*** (1.80 - 2.47) |
| UK and Ireland                                                                                          | 1.12 (0.64 - 1.96)              | 1.22 (0.73 - 2.05)    | 1.68* (1.05 - 2.69)   |
| Northern Europe                                                                                         | 2.60** (1.44 - 4.70)            | 2.76*** (1.58 - 4.80) | 3.23*** (1.74 - 5.97) |
| Southern Europe                                                                                         | 1.17 (0.58 - 2.35)              | 1.77 (0.96 - 3.28)    | 2.15* (1.11 - 4.18)   |
| Asia                                                                                                    | 0.96 (0.19 - 4.94)              | 1.15 (0.29 - 4.57)    | 0.71 (0.13 - 3.92)    |
| <i>Framingham 10-year predicted risk for CVD incidence (threshold = 20%)<sup>21 22</sup></i>            |                                 |                       |                       |
| Australia                                                                                               | 1.67*** (1.52 - 1.82)           | 2.13*** (1.94 - 2.34) | 2.37*** (2.14 - 2.63) |
| UK and Ireland                                                                                          | 1.71*** (1.30 - 2.25)           | 1.88*** (1.45 - 2.45) | 2.16*** (1.64 - 2.85) |
| Northern Europe                                                                                         | 2.55*** (1.70 - 3.85)           | 2.27*** (1.59 - 3.23) | 2.33*** (1.60 - 3.40) |
| Southern Europe                                                                                         | 1.32 (0.94 - 1.84)              | 1.67** (1.21 - 2.30)  | 2.07*** (1.45 - 2.95) |
| Asia                                                                                                    | 1.65 <sup>#</sup> (0.99 - 2.76) | 1.89** (1.20 - 2.97)  | 1.63* (1.02 - 2.61)   |

\*  $p < 0.05$ , \*\*  $p < 0.01$ , \*\*\*  $p < 0.001$ , <sup>#</sup>  $p = 0.054$

Abbreviations: BMI, body mass index; WC, waist circumference; WHR, waist-to-hip ratio.

**Table 3b Significant anthropometric measurements of general and central obesity and 10-year predicted risk of CVD incidence and mortality by ethnicity**

| Ethnicity                   | General CVD<br>(threshold = 10%) | General CVD<br>(threshold = 20%) | Framingham<br>(threshold = 20%) |
|-----------------------------|----------------------------------|----------------------------------|---------------------------------|
| <b>Odds-ratio criterion</b> |                                  |                                  |                                 |
| Australia                   | WHR, WC, BMI                     | WHR, WC, BMI                     | WHR, WC, BMI                    |
| UK and Ireland              | WHR, WC, BMI                     | WHR                              | WHR, WC, BMI                    |
| Northern Europe             | BMI, WC, WHR                     | WHR, WC, BMI                     | BMI, WHR, WC                    |
| Southern Europe             | WHR, WC                          | WHR                              | WHR, WC                         |
| Asia                        | -                                | -                                | WC, WHR, BMI <sup>#</sup>       |

Each cell represents statistically significant anthropometric measures of obesity ordered corresponding to odds-ratios, from the highest to lowest. <sup>#</sup> $p = 0.054$

Abbreviations: BMI, body mass index; WC, waist circumference; WHR, waist-to-hip ratio.

**Table 4 Area under the curve and cut-points for anthropometric measurements of general and central obesity to predict increased risk of CVD using risk score models at different thresholds for various levels of sensitivity and specificity by ethnicity**

|                                                                                         | AUC                   | Sensitivity = 70% | Sensitivity = 80% |
|-----------------------------------------------------------------------------------------|-----------------------|-------------------|-------------------|
| <b>General CVD 10-year predicted risk for CVD incidence and death (threshold = 10%)</b> |                       |                   |                   |
| Australia                                                                               |                       |                   |                   |
| BMI                                                                                     | 0.691 (0.666 , 0.716) | 24.2 (60.1%)      | 23.0 (46.1%)      |
| WC                                                                                      | 0.750 (0.727 , 0.772) | 77.3 (69.6%)      | 74.3 (57.9%)      |
| WHR                                                                                     | 0.759 (0.736 , 0.783) | 0.77 (70.1%)      | 0.75 (58.0%)      |
| UK and Ireland                                                                          |                       |                   |                   |
| BMI                                                                                     | 0.655 (0.584 , 0.726) | 23.7 (50.6%)      | 22.8 (41.2%)      |
| WC                                                                                      | 0.676 (0.611 , 0.741) | 75.3 (58.5%)      | 73.3 (51.2%)      |
| WHR                                                                                     | 0.729 (0.671 , 0.787) | 0.77 (65.6%)      | 0.75 (52.4%)      |
| Northern Europe                                                                         |                       |                   |                   |
| BMI                                                                                     | 0.770 (0.695 , 0.845) | 25.8 (71.4%)      | 24.4 (58.7%)      |
| WC                                                                                      | 0.761 (0.682 , 0.840) | 77.8 (66.7%)      | 75.3 (57.1%)      |
| WHR                                                                                     | 0.730 (0.642 , 0.817) | 0.77 (59.5%)      | 0.75 (50.8%)      |
| Southern Europe                                                                         |                       |                   |                   |
| BMI                                                                                     | 0.618 (0.536 , 0.699) | 26.5 (52.8%)      | 25.5 (44.9%)      |
| WC                                                                                      | 0.686 (0.604 , 0.768) | 81.8 (62.4%)      | 78.8 (53.4%)      |
| WHR                                                                                     | 0.702 (0.619 , 0.785) | 0.80 (61.8%)      | 0.79 (57.9%)      |
| Asia                                                                                    |                       |                   |                   |
| BMI                                                                                     | 0.564 (0.411 , 0.717) | 21.9 (38.2%)      | 21.8 (37.6%)      |
| WC                                                                                      | 0.651 (0.524 , 0.778) | 73.3 (60.0%)      | 71.8 (52.4%)      |
| WHR                                                                                     | 0.614 (0.490 , 0.739) | 0.76 (56.5%)      | 0.76 (54.7%)      |
| <b>General CVD 10-year predicted risk for CVD incidence and death (threshold = 20%)</b> |                       |                   |                   |
| Australia                                                                               |                       |                   |                   |
| BMI                                                                                     | 0.725 (0.677 , 0.772) | 25.5 (68.8%)      | 24.3 (58.1%)      |
| WC                                                                                      | 0.782 (0.743 , 0.821) | 79.8 (72.3%)      | 77.8 (66.4%)      |
| WHR                                                                                     | 0.784 (0.745 , 0.823) | 0.79 (76.3%)      | 0.77 (65.7%)      |
| UK and Ireland                                                                          |                       |                   |                   |
| BMI                                                                                     | 0.550 (0.414 , 0.685) | 23.0 (40.2%)      | 21.7 (25.4%)      |
| WC                                                                                      | 0.589 (0.472 , 0.706) | 74.8 (52.2%)      | 73.8 (48.3%)      |
| WHR                                                                                     | 0.682 (0.572 , 0.791) | 0.77 (61.3%)      | 0.75 (47.3%)      |
| Northern Europe                                                                         |                       |                   |                   |
| BMI                                                                                     | 0.818 (0.727 , 0.908) | 28.7 (82.4%)      | 26.3 (67.3%)      |
| WC                                                                                      | 0.861 (0.785 , 0.936) | 85.3 (81.1%)      | 84.3 (79.2%)      |
| WHR                                                                                     | 0.866 (0.784 , 0.947) | 0.84 (86.8%)      | 0.83 (84.9%)      |
| Southern Europe                                                                         |                       |                   |                   |
| BMI                                                                                     | 0.578 (0.437 , 0.719) | 26.8 (51.9%)      | 26.7 (50.9%)      |
| WC                                                                                      | 0.711 (0.562 , 0.859) | 84.8 (69.6%)      | 84.8 (69.6%)      |
| WHR                                                                                     | 0.725 (0.553 , 0.897) | 0.80 (62.1%)      | 0.79 (55.6%)      |
| Asia                                                                                    |                       |                   |                   |
| BMI                                                                                     | 0.555 (0.303 , 0.807) | 25.4 (73.1%)      | 21.9 (37.9%)      |
| WC                                                                                      | 0.630 (0.466 , 0.795) | 78.3 (73.6%)      | 71.8 (50.5%)      |

|                                                                                     |                       |              |              |
|-------------------------------------------------------------------------------------|-----------------------|--------------|--------------|
| WHR                                                                                 | 0.440 (0.306 , 0.573) | 0.76 (52.2%) | 0.74 (35.7%) |
| <b><i>Framingham 10-year predicted risk for CVD incidence (threshold = 20%)</i></b> |                       |              |              |
| Australia                                                                           |                       |              |              |
| BMI                                                                                 | 0.682 (0.657 , 0.707) | 24.0 (57.9%) | 22.9 (43.8%) |
| WC                                                                                  | 0.745 (0.723 , 0.768) | 76.8 (67.5%) | 73.8 (55.8%) |
| WHR                                                                                 | 0.759 (0.736 , 0.781) | 0.77 (69.7%) | 0.75 (58.1%) |
| UK and Ireland                                                                      |                       |              |              |
| BMI                                                                                 | 0.656 (0.586 , 0.726) | 23.7 (50.6%) | 22.5 (37.5%) |
| WC                                                                                  | 0.682 (0.620 , 0.745) | 75.3 (58.6%) | 73.3 (51.8%) |
| WHR                                                                                 | 0.735 (0.679 , 0.791) | 0.77 (65.8%) | 0.75 (54.2%) |
| Northern Europe                                                                     |                       |              |              |
| BMI                                                                                 | 0.783 (0.710 , 0.856) | 26.3 (75.2%) | 24.9 (65.1%) |
| WC                                                                                  | 0.770 (0.691 , 0.850) | 78.8 (71.3%) | 76.3 (60.5%) |
| WHR                                                                                 | 0.742 (0.652 , 0.832) | 0.77 (62.8%) | 0.75 (51.2%) |
| Southern Europe                                                                     |                       |              |              |
| BMI                                                                                 | 0.597 (0.514 , 0.680) | 25.8 (47.1%) | 25.1 (40.1%) |
| WC                                                                                  | 0.680 (0.601 , 0.760) | 80.8 (57.6%) | 78.3 (53.5%) |
| WHR                                                                                 | 0.711 (0.633 , 0.789) | 0.79 (61.6%) | 0.78 (51.7%) |
| Asia                                                                                |                       |              |              |
| BMI                                                                                 | 0.647 (0.524 , 0.770) | 23.5 (55.1%) | 21.9 (39.5%) |
| WC                                                                                  | 0.688 (0.586 , 0.790) | 73.3 (60.5%) | 71.8 (53.3%) |
| WHR                                                                                 | 0.645 (0.530 , 0.759) | 0.76 (56.9%) | 0.75 (44.3%) |

Abbreviations: AUC, area under the curve; BMI, body mass index; WC, waist circumference; WHR, waist-to-hip ratio.

## DISCUSSION

Our study found anthropometric measures of central obesity (WC and WHR) to be better indicators of CVD risk as they measure ectopic body fat (fat stored in the abdominal region) which is associated with decreased glucose tolerance, reduced insulin sensitivity, adverse lipid profiles and other metabolic abnormalities which are risk factors for CVD and diabetes.<sup>8</sup> Stronger associations were also reported between WC and the 10-year predicted CVD risk calculated using the general CVD and Framingham risk score models [compared with BMI and WHR](#) across most ethnic groups, while WHR recorded higher odds-ratios than WC and BMI and increased the likelihood of women being above the respective treatment thresholds of the models. WHR also presented higher area under the ROC curve, sensitivity and specificity values. Our findings are consistent with previous studies which have shown that WC and WHR, measures of central adiposity, are superior to BMI in predicting CVD and other obesity-related risk.<sup>23-26</sup> WC has already been incorporated in the diagnosis of the metabolic syndrome, a cluster of risk factors for CVD and diabetes.<sup>27</sup>

WHR should also be incorporated into CVD risk assessment. Our study provided evidence that WHR is a better diagnostic predictor of CVD than BMI and WC. It is also suitable for assessing adiposity and CVD risk in multi-ethnic cohorts as it has low measurement error, high precision, and no bias over a wide range of ethnic groups.<sup>13</sup> [Equivalence tests across ethnic groups showed WHR to be independent of ethnicity.](#)<sup>13</sup> Similar cut-off values for WHR could also be applied across ethnic groups; a value of 0.75 and 0.78 would indicate increased CVD risk for women of Australia and United Kingdom and Ireland, and Southern Europe descent, respectively. A study conducted on Latin Americans, non-Hispanic Whites and Blacks and Hispanics to estimate the accuracy and optimal cut-points for BMI, WC and WHR also found that a cut-point of 0.91 for WHR and 94 cm for WC could be used among women of different ethnicity to identify those at high coronary heart disease (CHD) risk.<sup>28</sup> WHR also reported the highest area under the ROC curve across all ethnic groups, ranging from 0.75 to 0.82.<sup>28</sup> It was also the most accurate measure to screen for high CHD risk individuals.<sup>28</sup> Another large case-control study of markers of obesity and myocardial infarction confirmed that WHR is a stronger indicator of myocardial infarction than BMI and increased the population



1  
2  
3 attributable risk of obesity by more than 3-fold in all ethnic groups.<sup>29</sup> The superiority of WHR over  
4 BMI and WC in predicting CVD risk is also demonstrated in prospective studies.<sup>23 30-33</sup>  
5  
6  
7

8  
9 The measurement of WHR, however, may pose some challenges. For example, it may be  
10 inappropriate to measure HC in certain cultures but this can be overcome with same sex observers.<sup>13</sup>  
11

12 Some studies reported that WHR is imprecise while others reported that it is a precise measure.<sup>13 30 34</sup>  
13

14  
15 <sup>35</sup> The differing results could be related to the rigour of the techniques used, standardised techniques  
16 need to be adopted when measuring WHR.<sup>13</sup> A study which evaluated the precision of measuring  
17 WHR, WC and HC with comparison across ethnic groups using data from the third Risk Factor  
18 Prevalence Study found that the coefficients of variation were 0.91% for WHR, 0.78% for WC and  
19 0.57% for HC, less than 1%, indicating good precision in females.<sup>13</sup> The measurement error was 0.02  
20 for WHR, 1.66 cm for WC and 1.59 cm for HC between two successive measurements in females.<sup>13</sup>  
21 In addition, the absolute difference between two WHR measurements for females was not  
22 significantly associated with the size of the participants.<sup>13</sup> WHR is not suitable for assessing central  
23 adiposity in the elderly<sup>36</sup> due to laxity of their abdominal muscles which would undermine the  
24 predictive value of abdominal circumferences.<sup>37</sup> In addition, WHR may remain constant during  
25 weight change and is not suitable for monitoring weight loss.<sup>38</sup> Finally, there are technical difficulties  
26 in accurately measuring the HC of severely obese individuals ( $BMI \geq 40 \text{ kg/m}^2$ ).<sup>13</sup> Measurements may  
27 be made in the supine position to overcome this problem.<sup>13</sup> In clinical settings, it may be more  
28 feasible to assess adiposity using WC while WHR could be measured in research studies as it is more  
29 informative.<sup>30</sup>  
30  
31  
32  
33  
34  
35  
36  
37  
38  
39  
40  
41  
42  
43  
44  
45  
46  
47

48 Although WHR was the best anthropometric obesity measure in relation to identifying individuals at  
49 increased CVD risk, this did not apply to Northern European women. BMI was a better indicator of  
50 CVD risk using the general CVD risk score model at the 10% threshold but not 20% threshold and the  
51 Framingham risk score model at the 20% threshold, with ~~stronger~~ higher correlations, higher odds-  
52 ratios, higher area under the ROC curves, sensitivity and specificity values presented, compared with  
53 WHR. At the 20% threshold of the general CVD risk score model, WHR was the better predictor of  
54  
55  
56  
57  
58  
59  
60

1  
2  
3 CVD risk in Northern European women compared to BMI. This indicates that the predictive ability of  
4 anthropometric measures of obesity vary with the treatment thresholds used for the respective risk  
5 score models and the same cut-point may not be suitable across ethnic groups.  
6  
7

8  
9  
10  
11 WC was a better predictor of CVD risk among Asian women compared to BMI and WHR. This was  
12 consistent with the results of another cross-sectional population-based survey study on Chinese people  
13 which reported that WC is the best predictor of CVD risk factors in women.<sup>39</sup> It was also the best  
14 marker of risk in a 6-year prospective study.<sup>40</sup> A small increment in WC predicted a substantial  
15 increase in CHD risk in the Chinese population.<sup>40</sup> It has been suggested that ethnicity influences  
16 specific fat depots, possibly explaining the relationship between ethnicity, adiposity and CVD risk.<sup>41</sup>  
17

18  
19 A lower WC cut-off for Asians is necessary to avoid underestimating the population at risk.<sup>41 42</sup>  
20  
21

22  
23 Our study has limitations. It is a cross-sectional study of the Australian female population in 1989 and  
24 these results require confirmation from prospective studies. In addition, it is limited by the use of  
25 country of birth as a proxy for ethnicity.<sup>43</sup> Although country of birth is a good proxy for ethnicity in  
26 older age minority groups and is of intrinsic interest in distinguishing environmental and genetic  
27 differences, it is no longer an appropriate proxy as it does not consider the diversity of country of  
28 origin of the individual. The measurement or assignment of ethnicity is difficult and the way forward  
29 is possibly to enable people to identify themselves.<sup>44</sup> Due to a sample size of about 200 for the Asian  
30 population, different regions in Asia could not be compared. Menopausal status which is associated  
31 with increased central obesity has not been assessed in our study and has not been incorporated into  
32 these risk score models.<sup>45</sup> Further, the CVD risk was estimated using risk score models in order to  
33 stratify individuals above and below the respective treatment thresholds and not actual CVD events.  
34 Only the Framingham and general CVD risk score models were assessed in our study. Other risk  
35 score models were excluded either because they could not be determined due to requirement for  
36 variables not assessed in our study (QRISK)<sup>46</sup> or, due to low number of participants above the  
37 respective recommended treatment thresholds (SCORE)<sup>47</sup>. Finally, the 10-year CVD risk for young  
38 adults is very rarely elevated, even in the presence of significant risk factors.<sup>48</sup>  
39  
40  
41  
42  
43  
44  
45  
46  
47  
48  
49  
50  
51  
52  
53  
54  
55  
56  
57  
58  
59  
60

## CONCLUSIONS

Our study confirms that ethnicity influences the association between anthropometric obesity measures and CVD risk. Central obesity measures such as WC and WHR are better indicators of CVD risk compared to BMI across ethnic groups. WHR is the best anthropometric measure for predicting CVD risk in women except Northern European and Asian women. The treatment threshold used for a risk score model affects the predictive ability of anthropometric obesity measures and the same cut-point may not be suitable across ethnic groups.

It is important to incorporate ethnicity in CVD risk assessment. Prevention and treatment efforts should be tailored to meet the needs of each ethnic group.<sup>49</sup> Ethnic-specific CVD prevention strategies need to be developed to promote healthy eating and physical activity to curtail obesity. Continued population-based prospective research is necessary to elucidate the link between obesity and CVD by ethnicity.

**Acknowledgements** Curtin University provided educational support to LGHG through the Curtin International Postgraduate Research Scholarship.

**Contributors** LGHG was involved in drafting the manuscript, performing the analysis, interpretation of data and revising the manuscript critically for important intellectual content. SSD conceived the study, performed the analysis and data interpretation and revised the manuscript critically for important intellectual content. TAW participated in the study design, acquired the data and revised the manuscript critically for important intellectual content. All authors read and approved the final manuscript.

**Competing interests** None.

**Funding** None.

1  
2  
3 **Ethics approval** We have ethics approval for the use of the National Heart Foundation data from the  
4 Australian Institute of Health Interim Ethics Committee, after consultation with the Commonwealth  
5 Privacy Commissioner, and approval from the Human Research Ethics Committee at Curtin  
6 University. This study was carried out in accordance with the Declaration of Helsinki.  
7  
8  
9  
10

11  
12  
13 **Data sharing statement** No additional data are available.  
14  
15  
16  
17  
18  
19  
20  
21  
22  
23  
24  
25  
26  
27  
28  
29  
30  
31  
32  
33  
34  
35  
36  
37  
38  
39  
40  
41  
42  
43  
44  
45  
46  
47  
48  
49  
50  
51  
52  
53  
54  
55  
56  
57  
58  
59  
60

## REFERENCES

1. Australian Bureau of Statistics. 4364.0.55.001 - Australian Health Survey: First Results, 2011-12  
Secondary 4364.0.55.001 - Australian Health Survey: First Results, 2011-12 2012.  
<http://www.abs.gov.au/AUSSTATS/abs@.nsf/DetailsPage/4364.0.55.0012011-12?OpenDocument>.
2. Sassi F, Devaux M, Cecchini M, et al. The Obesity Epidemic: Analysis of Past and Projected Future Trends in Selected OECD Countries, OECD Health Working Papers, No. 45, OECD Publishing, 2009.
3. National Health and Medical Research Council. Clinical practice guidelines for the management of overweight and obesity in adults, adolescents and children in Australia. Melbourne: National Health and Medical Research Council, 2013.
4. Australian Bureau of Statistics. 4719.0 - Overweight and obesity in adults 2004-05. Canberra: ABS, 2008.
5. O'Dea JA. Gender, ethnicity, culture and social class influences on childhood obesity among Australian schoolchildren: implications for treatment, prevention and community education. *Health Soc Care Community* 2008;**16**(3):282-90.
6. Lear SA, Toma M, Birmingham CL, et al. Modification of the relationship between simple anthropometric indices and risk factors by ethnic background. *Metabolism* 2003;**52**(10):1295-301.
7. Zhang X, Shu XO, Gao Y-T, et al. Anthropometric predictors of coronary heart disease in Chinese women. *Int J Obes* 2004;**28**:734-40.
8. Huxley R, Mendis S, Zheleznyakov E, et al. Body mass index, waist circumference and waist:hip ratio as predictors of cardiovascular risk—a review of the literature. *Eur J Clin Nutr* 2010;**64**:16-22.
9. Razak F, Anand S, Vuksan V, et al. Ethnic differences in the relationships between obesity and glucose-metabolic abnormalities: a cross-sectional population-based study. *Int J Obes* 2005;**29**:656-67.

- 1  
2  
3 10. Lee CMY, Huxley RR, Wildman RP, et al. Indices of abdominal obesity are better discriminators  
4  
5 of cardiovascular risk factors than BMI: a meta-analysis. *J Clin Epidemiol* 2008;**61**(7):646-  
6  
7 53.
- 8  
9 11. Obesity in Asia Collaboration. Ethnic comparisons of obesity in the Asia-Pacific region: protocol  
10  
11 for a collaborative overview of cross-sectional studies. *Obes Rev* 2005;**6**(3):193-98.
- 12  
13 12. Australian Risk Factor Prevalence Study Management Committee. Survey No. 3 1989. Canberra:  
14  
15 National Heart Foundation of Australia and Australia Institute of Health, 1990.
- 16  
17 13. Dhaliwal SS, Welborn TA. Measurement error and ethnic comparisons of measures of abdominal  
18  
19 obesity. *Prev Med* 2009;**49**(2-3):148-52.
- 20  
21 14. Boyle CA, Dobson AJ, Egger G, et al. Waist-to-hip ratios in Australia: A different picture of  
22  
23 obesity. *Aust J Nutr Diet* 1993;**50**:57-64.
- 24  
25 15. Alexander H, Dugdale A. Which waist-hip ratio? *Med J Aust* 1990;**153**(6):367-68.
- 26  
27 16. Anderson KM, Odell PM, Wilson PW, et al. Cardiovascular disease risk profiles. *Am Heart J*  
28  
29 1991;**121**(1 Part 2):293-98.
- 30  
31 17. Goh LGH, Dhaliwal SS, Lee AH, et al. Utility of established cardiovascular disease risk score  
32  
33 models for the 10-year prediction of disease outcomes in women. *Expert Rev Cardiovasc*  
34  
35 *Ther* 2013;**11**(4):425-35.
- 36  
37 18. D'Agostino RB, Vasan RS, Pencina MJ, et al. General cardiovascular risk profile for use in  
38  
39 primary care - The Framingham Heart Study. *Circulation* 2008;**117**(6):743-53.
- 40  
41 19. Mosca L, Benjamin EJ, Berra K, et al. Effectiveness-Based Guidelines for the Prevention of  
42  
43 Cardiovascular Disease in Women—2011 Update A Guideline From the American Heart  
44  
45 Association. *J Am Coll Cardiol* 2011;**57**(12):1404-23.
- 46  
47 20. Genest J, McPherson R, Frohlich J, et al. 2009 Canadian Cardiovascular Society/Canadian  
48  
49 guidelines for the diagnosis and treatment of dyslipidemia and prevention of cardiovascular  
50  
51 disease in the adult – 2009 recommendations. *Can J Cardiol* 2009;**25**(10):567-79.
- 52  
53 21. Neil HAW, Perera R, Armitage JM, et al. Estimated 10-year cardiovascular risk in a British  
54  
55 population: results of a national screening project. *Int J Clin Pract* 2008;**62**(9):1322-31.
- 56  
57  
58  
59  
60

- 1  
2  
3 22. Woodward M, Brindle P, Tunstall-Pedoe H. Adding social deprivation and family history to  
4 cardiovascular risk assessment: the ASSIGN score from the Scottish Heart Health Extended  
5 Cohort (SHHEC). *Heart* 2007;**93**(2):172-76.  
6  
7  
8  
9 23. Welborn TA, Dhaliwal SS. Preferred clinical measures of central obesity for predicting mortality.  
10 *Eur J Clin Nutr* 2007;**61**(12):1373-79.  
11  
12  
13 24. Wei M, Gaskill SP, Haffner SM, et al. Waist circumference as the best predictor of noninsulin  
14 dependent diabetes mellitus (NIDDM) compared to body mass index, waist/hip ratio and  
15 other anthropometric measurements in Mexican Americans--a 7-year prospective study. *Obes*  
16 *Res* 1997;**5**(1):16-23.  
17  
18  
19  
20  
21 25. Janssen I, Katzmarzyk PT, Ross R. Waist circumference and not body mass index explains  
22 obesity-related health risk. *Am J Clin Nutr* 2004;**79**(3):379-84.  
23  
24  
25 26. Biggaard J, Frederiksen K, Tjønneland A, et al. Waist circumference and body composition in  
26 relation to all-cause mortality in middle-aged men and women. *Int J Obes* 2005;**29**:778-84.  
27  
28  
29 27. Roger VL, Go AS, Lloyd-Jones DM, et al. Heart Disease and Stroke Statistics—2011 Update / 1.  
30 About 1. About These Statistics / 2. American Heart Association's 2020 Impact Goals / 3.  
31 Cardiovascular Diseases / 4. Subclinical Atherosclerosis / 5. Coronary Heart Disease, Acute  
32 Coronary Syndrome, and Angina Pectoris / 6. Stroke (Cerebrovascular Disease) / 7. High  
33 Blood Pressure / 8. Congenital Cardiovascular Defects / 9. Cardiomyopathy and Heart Failure  
34 / 10. Other Cardiovascular Diseases / 11. Family History and Genetics / 12. Risk Factor:  
35 Smoking/Tobacco Use / 13. Risk Factor: High Blood Cholesterol and Other Lipids / 14. Risk  
36 Factor: Physical Inactivity / 15. Risk Factor: Overweight and Obesity / 16. Risk Factor:  
37 Diabetes Mellitus / 17. End-Stage Renal Disease and Chronic Kidney Disease / 18. Metabolic  
38 Syndrome / 19. Nutrition / 20. Quality of Care / 21. Medical Procedures / 22. Economic Cost  
39 of Cardiovascular Disease / 23. At-a-Glance Summary Tables / 24. Glossary. *Circulation*  
40 2011;**123**(4):e18-e209.  
41  
42  
43  
44  
45  
46  
47  
48 28. Herrera VM, Casas JP, Miranda JJ, et al. Interethnic differences in the accuracy of anthropometric  
49 indicators of obesity in screening for high risk of coronary heart disease. *Int J Obes*  
50 2009;**33**:568-76.  
51  
52  
53  
54  
55  
56  
57  
58  
59  
60

- 1  
2  
3 29. Yusuf S, Hawken S, Ôunpuu S, et al. Obesity and the risk of myocardial infarction in 27□000  
4 participants from 52 countries: a case-control study. *Lancet* 2005;**366**(9497):1640-49.  
5  
6
- 7 30. de Koning L, Merchant AT, Pogue J, et al. Waist circumference and waist-to-hip ratio as  
8 predictors of cardiovascular events: meta-regression analysis of prospective studies. *Eur Heart*  
9 *J* 2007;**28**(7):850-56.  
10
- 11 31. See R, Abdullah SM, McGuire DK, et al. The Association of Differing Measures of Overweight  
12 and Obesity With Prevalent Atherosclerosis: The Dallas Heart Study. *J Am Coll Cardiol*  
13 2007;**50**(8):752-59.  
14
- 15 32. Welborn TA, Dhaliwal SS, Bennett SA. Waist-hip ratio is the dominant risk factor predicting  
16 cardiovascular death in Australia. *Med J Aust* 2003;**179**(11-12):580-85.  
17
- 18 33. Dhaliwal SS, Welborn TA. Central obesity and multivariable cardiovascular risk as assessed by  
19 the Framingham prediction scores. *Am J Cardiol* 2009;**103**:1403-07.  
20
- 21 34. Ulijaszek SJ, Kerr DA. Anthropometric measurement error and the assessment of nutritional  
22 status. *Br J Nutr* 1999;**82**(3):165-77.  
23
- 24 35. Sebo P, Beer-Borst S, Haller DM, et al. Reliability of doctors' anthropometric measurements to  
25 detect obesity. *Prev Med* 2008;**47**(4):389-93.  
26
- 27 36. Goodman-Gruen D, Barrett-Connor E. Sex Differences in Measures of Body Fat and Body Fat  
28 Distribution in the Elderly. *Am J Epidemiol* 1996;**143**(9):898-906.  
29
- 30 37. Turcato E, Bosello O, Di Francesco V, et al. Waist circumference and abdominal sagittal diameter  
31 as surrogates of body fat distribution in the elderly: their relation with cardiovascular risk  
32 factors. *Int J Obes Relat Metab Disord* 2000;**24**(8):1005-10.  
33
- 34 38. Caan B, Armstrong MA, Selby JV, et al. Changes in measurements of body fat distribution  
35 accompanying weight change. *Int J Obes Relat Metab Disord* 1994;**18**(6):397-404.  
36
- 37 39. Ho SC, Chen YM, Woo JLF, et al. Association between simple anthropometric indices and  
38 cardiovascular risk factors. *Int J Obes Relat Metab Disord* 2001;**25**(11):1689-97.  
39
- 40 40. Li G, Chen X, Jang Y, et al. Obesity, coronary heart disease risk factors and diabetes in Chinese:  
41 an approach to the criteria of obesity in the Chinese population. *Obes Rev* 2002;**3**(3):167-72.  
42  
43  
44  
45  
46  
47  
48  
49  
50  
51  
52  
53  
54  
55  
56  
57  
58  
59  
60



- 1  
2  
3 41. Kohli S, Sniderman AD, Tchernof A, et al. Ethnic-specific differences in abdominal subcutaneous  
4 adipose tissue compartments. *Obesity* 2010;**18**(11):2177-83.  
5  
6  
7 42. Tan C-E, Ma S, Wai D, et al. Can We Apply the National Cholesterol Education Program Adult  
8 Treatment Panel Definition of the Metabolic Syndrome to Asians? *Diabetes Care*  
9 2004;**27**(5):1182-86.  
10  
11  
12 43. Gill PS, Bhopal R, Wild S, et al. Limitations and potential of country of birth as proxy for ethnic  
13 group. *BMJ* 2005;**330**(7484):196.  
14  
15  
16 44. Bhopal R. Glossary of terms relating to ethnicity and race: for reflection and debate. *J Epidemiol*  
17 *Community Health* 2004;**58**(6):441-45.  
18  
19  
20 45. Carr MC. The Emergence of the Metabolic Syndrome with Menopause. *J Clin Endocrinol Metab*  
21 2003;**88**(6):2404-11.  
22  
23  
24 46. Hippisley-Cox J, Coupland C, Vinogradova Y, et al. Predicting cardiovascular risk in England and  
25 Wales: prospective derivation and validation of QRISK2. *BMJ* 2008;**336**(7659):1475-82.  
26  
27  
28 47. Conroy RM, Pyörälä K, Fitzgerald AP, et al. Estimation of ten-year risk of fatal cardiovascular  
29 disease in Europe: The SCORE project. *Eur Heart J* 2003;**24**(11):987-1003.  
30  
31  
32 48. Greenland P, Alpert JS, Beller GA, et al. 2010 ACCF/AHA Guideline for Assessment of  
33 Cardiovascular Risk in Asymptomatic Adults. *Circulation* 2010;**122**(25):e584-e636.  
34  
35  
36 49. Wang Y, Beydoun MA. The Obesity Epidemic in the United States—Gender, Age,  
37 Socioeconomic, Racial/Ethnic, and Geographic Characteristics: A Systematic Review and  
38 Meta-Regression Analysis. *Epidemiol Rev* 2007;**29**(1):6-28.  
39  
40  
41  
42  
43  
44  
45  
46  
47  
48  
49  
50  
51  
52  
53  
54  
55  
56  
57  
58  
59  
60

STROBE 2007 (v4) Statement—Checklist of items that should be included in reports of *cross-sectional studies*

| Section/Topic                | Item # | Recommendation                                                                                                                                                                       | Reported on page # |
|------------------------------|--------|--------------------------------------------------------------------------------------------------------------------------------------------------------------------------------------|--------------------|
| Title and abstract           | 1      | (a) Indicate the study's design with a commonly used term in the title or the abstract                                                                                               | 1                  |
|                              |        | (b) Provide in the abstract an informative and balanced summary of what was done and what was found                                                                                  | 2                  |
| <b>Introduction</b>          |        |                                                                                                                                                                                      |                    |
| Background/rationale         | 2      | Explain the scientific background and rationale for the investigation being reported                                                                                                 | 5                  |
| Objectives                   | 3      | State specific objectives, including any prespecified hypotheses                                                                                                                     | 5-6                |
| <b>Methods</b>               |        |                                                                                                                                                                                      |                    |
| Study design                 | 4      | Present key elements of study design early in the paper                                                                                                                              | 6                  |
| Setting                      | 5      | Describe the setting, locations, and relevant dates, including periods of recruitment, exposure, follow-up, and data collection                                                      | 6                  |
| Participants                 | 6      | (a) Give the eligibility criteria, and the sources and methods of selection of participants                                                                                          | 6                  |
| Variables                    | 7      | Clearly define all outcomes, exposures, predictors, potential confounders, and effect modifiers. Give diagnostic criteria, if applicable                                             | 6                  |
| Data sources/<br>measurement | 8*     | For each variable of interest, give sources of data and details of methods of assessment (measurement). Describe comparability of assessment methods if there is more than one group | 6-7                |
| Bias                         | 9      | Describe any efforts to address potential sources of bias                                                                                                                            | 6-7                |
| Study size                   | 10     | Explain how the study size was arrived at                                                                                                                                            | N.A.               |
| Quantitative variables       | 11     | Explain how quantitative variables were handled in the analyses. If applicable, describe which groupings were chosen and why                                                         | 8                  |
| Statistical methods          | 12     | (a) Describe all statistical methods, including those used to control for confounding                                                                                                | 8                  |
|                              |        | (b) Describe any methods used to examine subgroups and interactions                                                                                                                  | N.A.               |
|                              |        | (c) Explain how missing data were addressed                                                                                                                                          | N.A.               |
|                              |        | (d) If applicable, describe analytical methods taking account of sampling strategy                                                                                                   | N.A.               |
|                              |        | (e) Describe any sensitivity analyses                                                                                                                                                | N.A.               |
| <b>Results</b>               |        |                                                                                                                                                                                      |                    |

|                          |     |                                                                                                                                                                                                              |           |
|--------------------------|-----|--------------------------------------------------------------------------------------------------------------------------------------------------------------------------------------------------------------|-----------|
| Participants             | 13* | (a) Report numbers of individuals at each stage of study—eg numbers potentially eligible, examined for eligibility, confirmed eligible, included in the study, completing follow-up, and analysed            | 8-10      |
|                          |     | (b) Give reasons for non-participation at each stage                                                                                                                                                         | N.A.      |
|                          |     | (c) Consider use of a flow diagram                                                                                                                                                                           | N.A.      |
| Descriptive data         | 14* | (a) Give characteristics of study participants (eg demographic, clinical, social) and information on exposures and potential confounders                                                                     | 8-9,11    |
|                          |     | (b) Indicate number of participants with missing data for each variable of interest                                                                                                                          | N.A.      |
| Outcome data             | 15* | Report numbers of outcome events or summary measures                                                                                                                                                         | 8-16      |
| Main results             | 16  | (a) Give unadjusted estimates and, if applicable, confounder-adjusted estimates and their precision (eg, 95% confidence interval). Make clear which confounders were adjusted for and why they were included | 8-16      |
|                          |     | (b) Report category boundaries when continuous variables were categorized                                                                                                                                    | 8-16      |
|                          |     | (c) If relevant, consider translating estimates of relative risk into absolute risk for a meaningful time period                                                                                             | N.A.      |
| Other analyses           | 17  | Report other analyses done—eg analyses of subgroups and interactions, and sensitivity analyses                                                                                                               | 8-9,15-16 |
| <b>Discussion</b>        |     |                                                                                                                                                                                                              |           |
| Key results              | 18  | Summarise key results with reference to study objectives                                                                                                                                                     | 17        |
| Limitations              | 19  | Discuss limitations of the study, taking into account sources of potential bias or imprecision. Discuss both direction and magnitude of any potential bias                                                   | 19        |
| Interpretation           | 20  | Give a cautious overall interpretation of results considering objectives, limitations, multiplicity of analyses, results from similar studies, and other relevant evidence                                   | 20        |
| Generalisability         | 21  | Discuss the generalisability (external validity) of the study results                                                                                                                                        | 20        |
| <b>Other information</b> |     |                                                                                                                                                                                                              |           |
| Funding                  | 22  | Give the source of funding and the role of the funders for the present study and, if applicable, for the original study on which the present article is based                                                | N.A.      |

\*Give information separately for cases and controls in case-control studies and, if applicable, for exposed and unexposed groups in cohort and cross-sectional studies.

**Note:** An Explanation and Elaboration article discusses each checklist item and gives methodological background and published examples of transparent reporting. The STROBE checklist is best used in conjunction with this article (freely available on the Web sites of PLoS Medicine at <http://www.plosmedicine.org/>, Annals of Internal Medicine at <http://www.annals.org/>, and Epidemiology at <http://www.epidem.com/>). Information on the STROBE Initiative is available at [www.strobe-statement.org](http://www.strobe-statement.org).
